1

2

3

4 **WNT vampirization by glioblastoma leads to tumor growth and**  
5 **neurodegeneration**

6 Marta Portela<sup>1\*</sup>, Varun Venkataramani<sup>2,3,4</sup>, Natasha Fahey-Lozano<sup>1</sup>, Esther Seco<sup>1</sup>,  
7 Maria Losada-Perez<sup>1</sup>, Frank Winkler<sup>2,3</sup> and Sergio Casas-Tintó<sup>1\*</sup>

8 1- Instituto Cajal-CSIC. Av. del Doctor Arce, 37. 28002. Madrid. Spain

9 2- Neurology Clinic and National Center for Tumor Diseases, University Hospital  
10 Heidelberg, INF 400, 69120 Heidelberg, Germany

11 3- Clinical Cooperation Unit Neurooncology, German Cancer Consortium (DKTK),  
12 German Cancer Research Center (DKFZ), 69120 Heidelberg, Germany

13 4- Institute for Anatomy and Cell Biology, Heidelberg University, 69120 Heidelberg,  
14 Germany.

15

16 Corresponding author: [scasas@cajal.csic.es](mailto:scasas@cajal.csic.es) and [m.portela@cajal.csic.es](mailto:m.portela@cajal.csic.es)

17

18

19

20 Running title: Glioma-induced neurodegeneration

21

## 22 **Summary**

23 Glioblastoma (GB) is the most lethal brain tumor due to its high proliferation,  
24 aggressiveness, infiltration capacity and resilience to current treatments. Activation of  
25 the Wingless-related-integration-site (WNT) pathway is associated with a bad  
26 prognosis. Using *Drosophila* and primary xenograft models of human GB, we describe  
27 a mechanism that leads to the activation of WNT signaling [Wingless (Wg) in  
28 *Drosophila*] in tumor cells. GB cells display a network of tumor microtubes (TMs) which  
29 enwraps neurons, accumulates Wg receptor Frizzled1 (Fz1), and, thereby, actively  
30 depletes Wg from the neurons. Consequently, GB cells proliferate due to  $\beta$ -catenin  
31 activation, and neurons degenerate due to Wg signaling extinction. This novel view  
32 explains both neuron-dependent tumor progression, and also the neural decay  
33 associated with GB.

## 34 **Keywords**

35 Neuron, Glia, Cancer, Synapse-loss, wingless, Frizzled, beta-catenin, Glioblastoma,  
36 Cytoskeleton, Wg-depletion.

37

## 38 **Introduction**

39 The evolution of glioblastoma (referred here as GB) is accompanied by broad  
40 neurological dysfunctions, including neurocognitive disturbances, that compromise  
41 quality of life during the short life span of patients, one year usually <sup>1</sup>. These tumors are  
42 often resistant to standard treatments which include resection, radiotherapy and  
43 chemotherapy with temozolomide <sup>2</sup>. Numerous studies are focused on new molecular  
44 targets to treat GBs <sup>3-6</sup>; however, none of them has proven effective yet, which is in  
45 stark contrast to the considerable progress made in other tumor types. It is therefore  
46 necessary to explore new biological concepts that can lead to additional therapeutic  
47 strategies against GBs.

48 The WNT canonical pathway is activated upon the ligand “Wingless-related integration  
49 site” (WNT) binding to specific receptors (LRPs and FZD) in the plasma membrane. As  
50 a consequence, the destruction complex (APC and Axin) is inactivated and  $\beta$ -catenin  
51 (armadillo in *Drosophila*) is released. Further,  $\beta$ -catenin translocates into the cell  
52 nucleus where it promotes the expression of target genes (*i.e. Cyclin D1* and *Myc*)<sup>7-8</sup>.  
53 The WNT pathway is conserved through metazoans and it plays a central role in brain  
54 development<sup>9</sup>, adult neuronal physiology<sup>10</sup> and synaptogenesis<sup>11</sup>. Perturbations in  
55 WNT signaling are associated with neural deficits, Alzheimer’s disease and brain  
56 cancer, most notably GB<sup>12</sup>. WNT and FZD signaling can be deregulated in  
57 glioblastoma<sup>13-14</sup> (reviewed in<sup>15</sup>). In particular, one of the hallmarks of bad prognosis is  
58 the accumulation of  $\beta$ -catenin in tumoral cells<sup>16-17</sup>, indicating an activation of WNT/FZD  
59 pathway<sup>18</sup>.

60 GB cells extend ultra-long membrane protrusions that interconnect tumor cells<sup>19</sup>.  
61 These tumor microtubes (TMs) are associated with the worst prognosis in molecular  
62 subtypes of human gliomas. TMs contribute to invasion and proliferation, resulting in  
63 effective brain colonization by GB cells. Moreover, TMs constitute a multicellular  
64 network that connects GB cells over long distances, a feature that likely provides  
65 resistance against radiotherapy, chemotherapy and surgery<sup>19-20</sup>. Considering the many  
66 cytological similarities of TMs and tunneling nanotubes (TNTs)<sup>21</sup>, it seems that TMs in  
67 aggressive gliomas are the *in vivo* correlate of TNTs described in cell culture. In  
68 addition, TMs seem akin to a basic mechanism of cell-cell connection and molecular  
69 communication called “cytonemes” in *Drosophila*<sup>22</sup>. *Growth Associated Protein-43*  
70 (*GAP43*) is essential for the development of TMs and, thus, the tumor cell network  
71 which is associated with GB progression<sup>19</sup>. However, many aspects of this  
72 paradigmatic finding in glioma biology are still unexplored, including its impact on  
73 neighboring neurons.

74 Here, we report that *Drosophila* glial cells develop a TM network upon oncogenic  
75 transformation, akin to what is known from refined mouse glioma models, and from  
76 patients<sup>19</sup>. These TMs share characteristics in common with *Drosophila* epithelial  
77 cytonemes<sup>22-23</sup> which are also dependent on *igl/Gap43* expression. TMs relocate  
78 Frizzled (Fz1) receptor in the glia-neuron interphase, depleting Wingless (Wg) from  
79 neighboring neurons. As a consequence, the number of glioma cells increases, while  
80 neuronal synapse number decreases and neurodegeneration ensues. The concept of a  
81 Wg/Fz1 signaling equilibrium between glioma cells and neurons is relevant because it  
82 redefines GB as a neurodegenerative disease, and because it reveals a potential novel  
83 strategy against GB.

84

## 85 **Results**

### 86 ***Drosophila* glioma network**

87 To study the mechanisms of communication among malignant glial cells and  
88 neighboring neurons, we used a previously described *Drosophila* GB model<sup>24</sup>, which  
89 consists in the co-overexpression of constitutively active forms of EGFR (dEGFR $\Delta$ ) and  
90 the PI3K catalytic subunit p110 $\alpha$  (PI3K92E) driven by the glial specific *repo-Gal4*. This  
91 combination stimulates malignant transformation of post-embryonic larval glia, leading  
92 to lethal glial neoplasia<sup>24-25</sup> which is measured by the increase of glial cell number  
93 (GFP<sup>NLS</sup> positive) compared with a control brain (Figure 1A-C). Based on  
94 this *Drosophila* GB model we have evaluated the impact of glial tumor cell proliferation  
95 on neighboring neurons.

96 To visualize the total volume of the glial plasma membrane in larval brains, we  
97 expressed a myristoylated form of red fluorescent protein (expressed via *UAS-*  
98 *myrRFP*). RFP signal in control brains shows glial soma and the network formed

99 among WT glial cells (Figure 1D, D'). Relative to the control brain, the glioma brain  
100 shows a significant enlargement in glial membrane volume (Figure 1E, E').

101 In addition, we obtained transmission electron microscopy (TEM) images to visualize  
102 glia morphology in control samples (Figure 1F-H). High magnification TEM images  
103 show an enlargement of glial cells surface in glioma brain samples (Figure 1I), and the  
104 infiltration of glioma cells projections through the brain (Figure 1J). Glioblastoma tumor  
105 microtubes (TMs) are described in human GB samples as a cell to cell communication  
106 system <sup>19</sup>, we describe here comparable structures in *Drosophila* glioma brain samples.  
107 Magnifications of TEM images show the detail of perineuronal nests of TMs which  
108 surround and isolate neurons (Figure 1K-L).

109

110 TMs share characteristics with the cytonemes previously described in epithelial  
111 *Drosophila* cells <sup>19</sup>. Ihog (*interference hedgehog*) is a type 1 membrane protein shown  
112 to mediate the response to the active Hedgehog (Hh) protein signal <sup>26</sup>, which  
113 accumulates in the epithelial cytonemes <sup>27</sup>. To visualize glia projections in the entire  
114 brain of *Drosophila*, we expressed a *UAS-Ihog-RFP* construct under the control of  
115 *repo-Gal4*. This red fluorescent tagged form of Ihog-RFP in epithelial cells labels  
116 cellular processes (cytonemes) in the basal region of the wing imaginal discs <sup>27-28</sup>. The  
117 expression of *UAS-Ihog-RFP* under the control of *repo-Gal4* allows the visualization of  
118 projections in wild type glial that build an interconnecting network (Figure 1M, M'). The  
119 accumulation of Ihog in the cellular projections of transformed glial cells allowed  
120 labeling of the TMs-like processes (Figure 1N, N'). We used 3D reconstructions  
121 (IMARIS Bitplane, see materials and methods) from confocal stacks of images to  
122 quantify the volume of glial membrane projections, and we observed an expansion of  
123 TMs in glioma as compared to control brains (Figure 1O). Since the term tumor  
124 microtubes (TMs) is the now established terminology to describe thin membrane  
125 protrusions from malignant glioma cells in human and murine tumors <sup>19</sup>, we decided to

126 also use this term from here on for membrane protrusions in GB *Drosophila* cells  
127 observed across the brain.

128 To determine if TMs expand as a consequence of the increase in the number of GB  
129 cells, we quantified the volume of the TMs and divided by the number of glial cells  
130 (Figure 1P). The results show that TMs volume/glial cell number ratio is higher in GB  
131 and therefore we conclude that TMs grow in GB.

132 A detailed analysis of the contact region between neuron and GB cells revealed that  
133 glial TMs wrap clusters of neurons in individual GB “nests” (Figure 1K, L compared with  
134 G, and see video S1 and S2), this organization is comparable to previously described  
135 perineuronal nests in GB patients<sup>29</sup>. To confirm the neuronal identity of the cells within  
136 the nests, we used antibodies to specifically mark neurons (anti-Hrp and anti-ELAV,  
137 green in Figure 1Q-R) and the Ihog-RFP or myr-RFP to visualize the TMs. The results  
138 show that TMs infiltrate within neuronal groups and enwrap neurons which segregate  
139 neuronal populations.

140 TMs were previously described to be actin based projections (as cytonemes)<sup>19</sup>, to  
141 further determine the identity of the TMs in *Drosophila* glioma cells, we took advantage  
142 of the LifeActin-GFP reporter and observed in confocal images that TMs (ihog positive)  
143 are also actin-based (Figure S1A-C’’’). Moreover, confocal 3D reconstructions  
144 (IMARIS, bitplane) of control and glioma brains with the glial network marked with ihog-  
145 RFP and LifeAct-GFP showed that actin based TMs form perineuronal nests (Figure  
146 S1A-B’’’ and Videos S4-S5). Additionally we characterized the TMs with four  
147 previously described markers for cytonemes in *Drosophila*<sup>28</sup> and orthologues markers  
148 of human TMs<sup>19,28</sup> (GMA-GFP, GPI-YFP, GFP-MLC and Sqh-GFP in Figure S1D-G).  
149 Moreover, we performed functional experiments (Figure S1 H-I’’’) where the TMs  
150 marked with ihog-RFP, are defective after the downregulation of *neuroglian* (*nrg-RNAi*)

151 as it has been previously described in epithelial cytonemes<sup>30</sup>. All these results together  
152 suggests that glioma cells build an organized TMs network around the neurons.

153 Next we sought to clarify whether similar molecular machineries are involved in human  
154 and *Drosophila* TMs. Growth-Associated protein 43 (GAP43) is necessary for TMs  
155 formation and function, and drives microtubule-dependent tumor cell invasion,  
156 proliferation, interconnection, and radioresistance<sup>19</sup>. We have reproduced this specific  
157 and unique characteristic of human GB in the *Drosophila* model. To determine whether  
158 the *Drosophila* glial network is susceptible to *GAP43* depletion, as it has been  
159 described in human tumor cells<sup>19</sup>, we knocked down *igloo (igl)*, the invertebrate GAP-  
160 43-like gene<sup>31</sup>, in glioma cells. Confocal images of larval brains show that the glioma  
161 network does not develop upon *igl* silencing and, as a consequence, glial TMs do not  
162 enwrap neurons showing a phenotype similar to the control (Figure S1J-L' and video  
163 S1-3).

164 To exclude the possibility that suppression of TMs expansion and glioma progression  
165 was due to a titration of GAL4 activity caused by introducing an additional UAS-  
166 transgene, we also tested whether co-expression of *UAS-lacZ* or *UAS-yellow-RNAi* had  
167 any rescuing ability in glioma brains. The observed phenotypes such as the number of  
168 glial cells and the GB nests were unchanged in the presence of an additional UAS-  
169 transgene (Figure S2A-B). This observation indicates that in *Drosophila* glioma *igl*  
170 reproduces the function previously described in human samples.

171 The genetic disruption of *igl/Gap43* prevents the tumoral network of TMs and halts the  
172 overgrowth of glioma cell membranes. Moreover, the direct consequence on flies  
173 developing a glioma is larval/pupal lethality. Upon *igl* knockdown, however, the glioma-  
174 induced lethality is prevented allowing the emergence of adults (Figure S1M).  
175 Interestingly, *igl* knockdown in wild type glial cells neither affects the normal  
176 development of neurons and glia, nor their viability (Figure S2C-G). Taking all data

177 together, transformed glial cells take advantage of the *igl*/Gap43-dependent tumoral  
178 network to proliferate and enwrap neurons and, as a consequence, cause death. Thus,  
179 the dependency of TMs on *igl*/GAP43 is conserved between flies and gliomas  
180 originated from human tumor cells.

### 181 **Wingless signaling in glioma**

182 GB is characterized by the deregulation of many key signaling pathways involving  
183 growth, proliferation, survival, and apoptosis, such as p53, pRB, EGFR, PI3K, STAT3  
184 or WNT<sup>32-33</sup>. WNT signaling has long been suggested as a hallmark in gliomagenesis  
185 associated with the proliferation of stem-like cells in human GBs<sup>34</sup>. WNT signaling  
186 promotes tumoral cell proliferation and dissemination as well as resistance to chemo  
187 and radiotherapy (reviewed in<sup>15,35</sup>). To assess the prevalence of WNT genes/pathway  
188 deregulation in GB, we searched for mutations related to WNT pathway in the  
189 Collection of Somatic Mutations in Cancer (COSMIC). We analyzed data from 922  
190 samples of grade IV astrocytomas (GB) searching for gain of expression or  
191 duplications. First, we analyzed *Wnt* family genes, which encode the ligands of the  
192 WNT pathway. In particular, we analyzed WNT6 that is related to the self-renewal  
193 ability of GB cells<sup>36</sup>, WNT3A and WNT1 overexpression that is detected in glial stem  
194 cells<sup>37</sup> and WNT5A and WNT2 that were shown to induce migration of GB cells<sup>38-39</sup>.  
195 Our analysis of the COSMIC database revealed that WNT1, WNT3A, WNT6 or WNT5A  
196 genes do not appear mutated in GB samples and only 6 cases showed mutations in  
197 WNT2 (0,6%) (Figure S3A). WNT signaling is a hallmark of GBs, but as no evident  
198 changes in WNT expression were found, we searched for mutations in FZD genes, that  
199 encode the receptors of WNT. In particular, we analyzed FZD2 and FZD9 that are  
200 linked to self-renewal ability in GB<sup>36,39-40</sup> and FZD4, a positive WNT regulator, which is  
201 a causative effector for invasive phenotypes of GB cells<sup>41</sup>. We did not find any case of  
202 a GB patient with a gain of expression in FZD2 or FZD4, and barely 4 cases (0,4%)  
203 showed a mutation for FZD9. The total number of mutations related with WNT or FZD



204 genes accounts for 5% of the total GB samples analyzed (Figure S3A). In addition, we  
205 analyzed data from GB in The Cancer Genome Atlas (TCGA) for WNT ligands, FZD  
206 receptors and transcriptional targets of WNT pathway databases (Figure S3B-D)  
207 through the Xena Functional Genomics Explorer (<https://xenabrowser.net/>). We  
208 analyzed expression levels in primary GB tissue and non tumoral tissue, transcriptional  
209 targets for WNT pathway (Figure S3B) are upregulated in GB samples. However, WNT  
210 ligands from the canonical WNT pathway are not upregulated (Figure S3C) and among  
211 FZD receptors, only FZD7 shows significant changes in GB tissue (Figure S3D).  
212 Taking all these data together, in spite of WNT pathway activation in GB tissue, there is  
213 no correlation between overexpression of WNT ligands and GB development.

214 Nevertheless, previous reports indicate that WNT targets, such as FoxM1 which  
215 promotes nuclear localization of  $\beta$ -catenin, or  $\beta$ -catenin itself are related with Glial  
216 Stem Cells (GSC) maintenance and tumorigenesis. Indeed, they are standard  
217 biomarkers for GB bad prognosis<sup>16,42-45</sup>.  $\beta$ -catenin activation (translocation to the  
218 nuclei) is a downstream event of WNT pathway. It has been identified in 19% of  
219 surgical samples from adult GB patients and in 30% of surgical samples from pediatric  
220 patients. Moreover, WNT inhibition leads to suppression of tumor growth, proliferation  
221 in cultures, and a modest induction of cell death<sup>34</sup>.

222 Given the discrepancy between the presence of WNT pathway markers and the lack of  
223 mutations in GB samples, we decided to study *Wingless* (*wg*) expression, the fly  
224 homologue to human WNT, in our glioma model. We quantified anti-Wg signal intensity  
225 in glial cells and neuronal tissue and obtained the Wg in glia vs Wg in neurons pixel  
226 intensity ratio. The results showed that Wg protein is homogeneously distributed in  
227 control larval brains with a slight increase (1,5 ratio) in glial membranes (Figure 2A-A'',  
228 C) but glioma brains showed a four-fold increase in accumulation of Wg in tumoral cells  
229 (Figure 2B-B'', C), in line with WNT accumulation in human GBs<sup>38,46</sup>. To determine  
230 whether Wg could be signaling to the glial cells, we assessed the presence of Frizzled

231 (Fz) receptors in glial membranes. Monoclonal antibodies were used to visualize the  
232 Fz1 and Fz2 receptors in control samples, the quantification of anti-Fz1 signal in glia vs  
233 neurons shows that Fz1 receptors are localized homogeneously across the brain with a  
234 small accumulation in glial membranes (Fz1, Figure 2D-D'', H). Fz2 staining shows the  
235 expected pattern in the wing disc<sup>47</sup> as a control (Figure S4A) and it is localized  
236 homogeneously in control brains (S4B-B'''). However in glioma samples, Fz1 is highly  
237 accumulated in glial membranes (Figure 2E-E'', H). No changes for Fz2 were detected  
238 in glioma brains (Figure S4C-C'''). In addition, a detailed analysis of glioma brains  
239 revealed that Fz1 protein specifically accumulated in TMs (iHog<sup>+</sup>) (Figure 2E''). The  
240 results indicate that Fz1 is preferentially accumulated in perineuronal nests of TMs, in  
241 contact with neighboring neurons. These data suggest that the glioma TMs network  
242 contributes to Wg/Fz1 signaling.

243 To evaluate the contribution of Fz1 to the progression of the glioma, we knocked down  
244 the Fz1 receptor (using *UAS-Fz1-RNAi*) in transformed glial cells. First we validated  
245 *UAS-Fz1-RNAi* tool in epithelial tissue from larvae wing imaginal discs. Even though  
246 Fz1 expression in wing imaginal disc is discrete, upon *UAS-Fz1-RNAi* expression in the  
247 posterior compartment (marked with GFP), there is a reduction in Fz1 protein signal  
248 compared with the anterior compartment from the same tissue (Figure S5A). Brains  
249 showed a significant reduction of Fz1 protein expression (Figure 2F, H). However, TMs  
250 network was still formed (Figure 2F'). Furthermore, we inhibited the development of the  
251 glioma network by expressing *UAS-igl-RNAi* and stained the brains for Fz1. Under  
252 these conditions the network does not expand, Fz1 does not accumulate in TMs and it  
253 shows a homogeneous distribution comparable between glia and neurons (Figure 2G-  
254 G', H). These results indicate that Fz1 accumulation in TMs is a consequence of the  
255 glioma network but suggests that Fz1 accumulation in the TMs is dispensable for  
256 glioma network formation.

257 **Glial Fz1 interacts with neuronal Wg**

258 The abnormal distribution of Wg and Fz1 in glioma brains could be due to either an  
259 increase in gene expression or to redistribution of the protein. First, to determine *wg*  
260 and *Fz1* transcription levels in glioma, we performed quantitative PCR experiments  
261 from brain RNA extracts. The results showed that *wg* and *Fz1* transcription levels are  
262 comparable in control and gliomas (supp. Figure S6A). To consider the mRNA  
263 translation or protein stability and degradation, we measured total Fz1 and Fz2 protein  
264 levels in Western blot experiments. Control and glioma brain protein extracts were  
265 blotted and incubated with anti-Fz1 or Fz2 antibodies; Tubulin was used as a loading  
266 control (Supp. Figure S6B). Quantification of the membranes showed no significant  
267 changes for Fz1 protein levels in glioma (Supp. Figure S6B). Moreover, we performed  
268 *in situ* hybridization experiments to detect Wg and Fz1 mRNA expression in control and  
269 glioma brains. The results are consistent with the qPCRs results (Figure S6A) showing  
270 no differences for *wg* or *Fz1* transcription between controls and gliomas (Figure S6C).

271 The data indicate that in spite of a higher signal for Wg and Fz1 proteins in glioma cells  
272 by immunofluorescence, there are no changes in gene expression. We hypothesized  
273 that Fz1 is transported and accumulated along glioma TMs, which contact neighboring  
274 neurons and receive Wg from them.

275 According to this hypothesis, the glial membranes would be in close proximity to  
276 neuronal membranes to allow Fz1-Wg interaction. To assess this, we performed  
277 GRASP experiments<sup>48</sup>. This technique determines intimate physical interaction among  
278 glia and neurons, in the range of 20-40nm (synaptic distance) which is compatible with  
279 protein-protein interaction<sup>48</sup>. Each split fragment of the green fluorescent protein (GFP)  
280 was expressed in neurons (*elav-lexA*) or glial (*repo-Gal4*) cells, respectively (see  
281 Material and Methods). Only upon intimate contact between the two split fragments  
282 GFP fluorescence is reconstituted. Control samples (Figure 3A-C'') showed a discrete  
283 signal corresponding to the physiological interaction between glia and neurons,  
284 nevertheless, upon glioma induction a massive GFP signal from GRASP reporter was

285 detected (Figure 3D-F''). This result indicates that, in a glioma condition, there is a  
286 significant increase of glia-neuron membrane interaction, consistent with the TEM  
287 images (Figure 1H-L) showing perineuronal nests of TMs which surround and isolate  
288 neurons.

289 We had observed specific signal localization for Wg and Fz1 in glioma membranes  
290 (myr-RFP/ihog-RFP) (Figure 2B-B'', E-E''). To confirm the physical interaction of Fz1  
291 and Wg proteins we performed proximity ligation assays (PLA) (see Materials and  
292 Methods)<sup>49</sup>. This quantitative method reports the interactions between two proteins  
293 with a resolution of 40nm<sup>50</sup>. Control brains showed a discrete number of puncta  
294 showing the physiological interactions (Figure 3G-H' and quantifications in 3I, J)).  
295 However, glioma brains showed a five-fold increase in the number of PLA<sup>+</sup> puncta  
296 (Figure 3H', I, J) indicating a significant increase in the number of Fz1-Wg interactions.  
297 Moreover, we calculated the number of Wg-Fz1 interactions per glial cell in control and  
298 glioma brains and the results show that the number of interactions per cells is higher in  
299 the glioma brains (Figure 3J). These results confirm that glioma cells accumulate Fz1  
300 receptor in TMs, and then this specific receptor interacts with Wg. But Wg is not  
301 upregulated in the glioma brain so we hypothesize that Wg comes from neighboring  
302 neuronal membranes and it relocates and accumulates in glioma cell membranes.

### 303 **Wg/Fz1 pathway targets are active in glioma and inactive in neurons**

304 Wg targets are indicators of Wg/Fz1 activity in the recipient cell. Armadillo/ $\beta$ Catenin is  
305 a cytoplasmic protein which, upon activation of Wg pathway, translocates into the  
306 nucleus and activates transcription of target genes<sup>12,51</sup>. To determine if Fz1 is signaling  
307 in gliomas as a consequence of Wg-Fz1 interaction, we stained control and glioma  
308 brains for Armadillo (Arm) with a specific antibody that detects Arm protein and is  
309 mainly visible in its cytoplasmic inactive form (Cyt-Arm)<sup>52</sup>. Cyt-Arm was  
310 homogeneously distributed along the brain in control samples (Figure 4A, D). However,

311 glioma brains showed accumulation of Cyt-Arm in the cytoplasm of the neurons and a  
312 reduction in glioma cells (Figure 4B, D). This result suggests that, in glioma brains,  
313 Wg/Fz1 pathway is inactive in neurons and active in glioma cells. More importantly, this  
314 data shows that the network expansion and the accumulation of Fz1 in the TM  
315 projections have an effect on neighboring neurons. Further, we dismantled the glioma  
316 network expressing *UAS-igl-RNAi* or downregulated Fz1 (*UAS-Fz1-RNAi*) and stained  
317 for Cyt-Arm. Under this condition, Cyt-Arm was homogeneously distributed along the  
318 brain similar to the control (Figure 4C, D and S7A) demonstrating that the network is  
319 required to promote Wg signaling in the transformed glia.

320 To further confirm that Wg pathway is active in the glial transformed cells and silenced  
321 in neurons, we used five additional Wg pathway reporters, namely *arm-GFP*, *nkd-lacZ*,  
322 *tsh-lacZ*, *fz4-GFP* and *dally-LacZ*<sup>54-55</sup>. The results showed that all these reporters were  
323 active in glioma cells and inactive in neurons compared to control brains (Figure 4E-H  
324 and Figure S7B-G'') which confirm that the Wg/Fz1 pathway is inactive in neurons  
325 confronted to a GB, and active in GB cells.

326 Since we observed specific signal localization and accumulation of Wg and Fz1 in  
327 glioma membranes and consequently the activation of the pathway in glioma cells, we  
328 wondered if these results were conserved in human glioma cells. Therefore, we used a  
329 primary patient-derived glioblastoma culture xenograft model using S24 cells kept  
330 under stem-like conditions (see Materials and Methods), which reproduce previously  
331 described Scherer modes, perivascular migration and spread<sup>29,56</sup>. GFP-marked S24  
332 cells were injected in the brain of NMRI nude mice, and brains were removed and  
333 analyzed 90 days later (as previously described in<sup>19</sup>). To validate our data, we  
334 performed a series of more diffuse tumor parts (history grade II-like tumor periphery  
335 where normal brain has just been colonized) and denser tumor parts (grade III-IV like,  
336 from central areas) GB images from S24 xenografts brain sections.

337 We stained the samples for  $\beta$ -catenin and WNT1 proteins in S24 xenograft brain  
338 sections and compared them to control samples (Figure 4I-N and Figure S8G-H). We  
339 observed a significant increase of both proteins in GB cells, in line with previous  
340 observations. These data indicate that WNT1 is deposited in GB cells and activates  
341 WNT pathway; consequently  $\beta$ -Catenin is upregulated to mediate GB cells malignancy  
342 <sup>16</sup>. Moreover, images of the WNT1 and  $\beta$ Catenin staining of grade II and III GB images  
343 from S24 xenografts brain sections and quantification of the pixel intensity indicates  
344 that the accumulation of WNT1 and activation of  $\beta$ Catenin correlates with the growth of  
345 the tumor (Figure S8A-F).

346 To determine Fz1's contribution to the proliferation of *Drosophila* gliomas we quantified  
347 the number of transformed glial cells upon *Fz1* downregulation. A specific Repo  
348 antibody was used to mark glial cell nuclei in the brains. The data show a significant  
349 increase of glial cell number in glioma brains, which is prevented by *Fz1*  
350 downregulation or TM network dismantlement (Figure 5A-E). In addition, we studied  
351 the adult survival by quantifying the number of flies with glioma and/or *Fz1-RNAi*  
352 expression. First, Fz1 downregulation in normal glial cells allows 80% adult survival.  
353 On the other hand, the glioma caused 100% lethality in larval or pupal stages. By  
354 contrast, glioma lethality was reverted upon *Fz1* downregulation in repo cells, and 70%  
355 of the animals reached adulthood (Figure 5F). In conclusion, Fz1 is not necessary for  
356 the glioma network overgrowth but Wg/Fz1 signaling is necessary for the increase in  
357 the number of tumoral cells and the associated lethality.

358

### 359 **Wg/Fz1 pathway disruption in adult brains**

360 To discard that these results are restricted to a developmental process, we performed  
361 similar experiments in adult brains. We included the *tub>Gal80<sup>TS</sup>* system to repress  
362 Gal4 activation during all developmental stages (see Materials and Methods), glioma

363 was induced 4 days after adult eclosion when adult brain is fully differentiated. Analysis  
364 of adult flies survival indicate that animals with glioma start dying at day 9 after the  
365 glioma induction until the 14th day, significantly earlier that control flies. (Figure S9A). 7  
366 days after glioma induction we stained for Cyt-Arm, Fz1 and Wg control and glioma  
367 adult brain samples and quantified (n>15) the average pixel intensity ratio (Glial cells  
368 membranes RFP+ vs neuronal tissue (Figure S9B-H). The results reproduce the  
369 findings from larval brains: Fz1 and Wg proteins are accumulated in glioma tissue and  
370 Cyt-Arm signal shows an increase of wg-pathway activity in glioma cells. Therefore,  
371 there are no differences between larval and adult brains regarding Wg-pathway in  
372 glioma cells and neurons. Moreover, we analyzed *Drosophila* adult negative geotaxis  
373 behavior (climbing assay), as an indication for possible motor defects associated with  
374 neurodegeneration. The results showed symptoms of neurodegeneration in glioma flies  
375 compared to controls (Video S6).

### 376 **Gliomas cause Neurodegeneration**

377 Previous results suggest that a neurodegeneration process is taking place in glioma  
378 brains. To determine whether the glioma is causing neurodegeneration we quantified  
379 the number of active zones (synapses) in the neuromuscular junction (NMJ). This well-  
380 established system has been used for decades to study neurodegeneration in  
381 *Drosophila*<sup>57-60</sup>, motor neuron soma is located in the central nervous system, but  
382 synapse counting can be accurately done in synaptic buttons located in adult or larva  
383 muscular wall. Adult NMJs Quantification of confocal images stained with anti-  
384 bruchpilot (Nc82) revealed a significant reduction in the number of synapses in glioma  
385 adult (Figure S9I) or larval NMJs compared to controls (Figure 6A-B, F) and therefore,  
386 a neurodegenerative process, which is prevented by Fz1 downregulation or TM  
387 network dismantlement (igl downregulation) (Figure 6C-D, F).

388

### 389 **Wg expression in glioma cells is dispensable for tumor progression**

390 Fz1 receptor is accumulated in glioma TMs and contributes to Wg depletion and  
391 pathway equilibrium disruption. To determine whether the source of Wg is neuronal or  
392 glial, we silenced *wg* expression in neurons exposed to glioma, or in glioma cells. First  
393 we validated *UAS-wg-RNAi* tool in epithelial tissue, wing imaginal discs. Activation of  
394 *UAS-wg-RNAi* in the posterior compartment (marked with GFP) cause a reduction of  
395 specific monoclonal anti-wg (Figure S5B). Pan-neuronal *wg* silencing (*elav>wg RNAi*)  
396 is lethal in line with our hypothesis regarding the requirement of Wg in neuronal  
397 biology. Besides, *wg* knockdown (*wg-RNAi*) in glioma cells (*Repo>PI3K; EGFR; wg-*  
398 *RNAi*) does not prevent glioma cell number increase (Figure 6G-I, K) nor glioma TMs  
399 volume expansion (Figure 6G-I, L), these results suggest that *wg* expression in glioma  
400 cells is not relevant for glioma progression.

401 Moreover, to stress on the contribution of Fz1 receptor as mediator for Wg depletion,  
402 we generated glioma cells and silenced *Fz1* expression, in addition we expressed a  
403 constitutively active form of *armadillo* (*UAS-armS10*)<sup>61</sup> to activate Wg pathway  
404 downstream Wg-Fz1 in these gliomas (Figure 6E-F and J-L). We counted the number  
405 of synapses and observed that it is comparable to glioma + *Fz1RNAi* (Figure 6C-F).  
406 This result suggests that the reduction in the number of synapses is specifically  
407 mediated by Fz1 accumulation. To confirm that the Fz1 depletion and Arm signaling  
408 produces a glioma like condition we counted the number of glial cells and TM network  
409 volume (Figure 6G-L). We observed that in this case the number of glioma cells  
410 increased and TMs expanded (Figure 6J-L) similar to a glioma (Figure 6H).

### 411 **Wg/Fz1 pathway disruption causes neurodegeneration**

412 Neuronal development and physiology are dependent on Wg/Fz1 signaling and  
413 disruptions in this signaling pathway lead to synapse loss, an early symptom of  
414 neurodegeneration (reviewed in<sup>62-65</sup>). To determine if an imbalance in Wg distribution



415 caused by glioma cells can affect the neighboring neurons, we aimed to determine the  
416 contribution of Fz1/Wg pathway to neuronal physiology. To inhibit Wg/Fz1 pathway  
417 signaling we expressed *UAS-fz1-RNAi* or *UAS-wg-RNAi* in motor neurons under the  
418 control of a *D42-Gal4* driver<sup>66</sup> and quantified the number of active zones (synapses) in  
419 the neuromuscular junction (NMJ). Quantification of confocal images stained with anti-  
420 bruchpilot (Nc82) revealed a significant reduction in the number of synapses and  
421 therefore, a neurodegenerative process (Figure 7A-D). These data suggest that  
422 Wg/Fz1 signaling pathway activity in neurons is necessary in for synaptogenesis.

423 So far, we have demonstrated that glioma cells cause a disruption of Wg/Fz1 signaling  
424 in neurons (Figure 4) and our data suggest that this is dependent on Fz1 accumulation  
425 in glioma cells (Figure 2). Next, we decided to restore this signaling equilibrium by  
426 overexpressing Fz1 receptor in neurons surrounded by glioma cells. To avoid crossed  
427 expression we generated Fz1 transgenic flies based on the LexA-LexAop expression  
428 system<sup>67</sup>, which is independent of the Gal4-UAS system used to generate the glioma.  
429 We validated this newly generated tool in *Drosophila* brains. *LexAop-Fz1* was activated  
430 in neurons under the control of *elav-LexA* and monoclonal anti-Fz1 showed higher  
431 signal in neurons and functional activity revealed by anti-Arm staining (Figure S5C-E).  
432 Oversized glioma brains showed the expected glioma network compartmentalizing  
433 neurons in the brain (Figure 7E-F''). However, Fz1 overexpression in neurons restored  
434 homogeneous Fz1 protein distribution in the brain (Figure 7G, H), rescued brain size  
435 (Figure 7G-G'') and neuron distribution and morphology (Figure 7H'-H''). In addition,  
436 Fz1 equilibrium restoration partially rescued lethality and most animals reached  
437 adulthood. To verify Fz1 activation of the pathway we stained for Wg and Cyt-Arm  
438 (Figure S10). As previously shown, glioma brains showed a heterogeneous distribution  
439 for Wg protein (Figure S10A-A'') and, as a consequence, an imbalance in pathway  
440 activation reported by Cyt-Arm accumulation (Figure S10 C-C''). As expected,

441 neuronal Fz1 overexpression in glioma brains restored Wg distribution and Cyt-Arm  
442 signal to a control situation (Figure S10B-B'', D-D'')

443 To further determine the effect of Wg/Fz1 signal restoration in neurons, we quantified  
444 the number synapses in their NMJs. Neuronal morphology is disrupted by glioma  
445 (Figure 7I, J) and restored by Fz1 overexpression in neurons neighboring glioma cells  
446 (Figure 7J, K). Moreover, synapse number reduction upon glioma induction is restored  
447 by Fz1 overexpression in neurons (Figure 7L). All these results indicate that the  
448 Wg/Fz1 pathway disruption caused by glioma is responsible of the synapse loss.  
449 Restoration of the signaling equilibrium between glia and neurons prevents synapse  
450 loss and therefore, neurodegeneration.

#### 451 **Glioma depletes Wg from neuronal membranes**

452 The actual mechanisms of Wingless delivery have been under debate. This protein  
453 was initially described as a diffusible secreted protein <sup>68</sup>. Recent studies have proved  
454 that Wg secretion is not necessary for *Drosophila* development <sup>69</sup>. A membrane-  
455 tethered version of Wg protein <sup>70</sup> (*Wg<sup>NRT</sup>*) can substitute the endogenous gene, mimic  
456 Wg normal functions and produce viable organisms <sup>69</sup>. We took advantage of this tool  
457 to determine the cellular mechanisms mediating glioma Wg retrieval from neurons. We  
458 created a genetic combination to substitute one copy of endogenous Wg with one copy  
459 of *wg<sup>NRT</sup>* exclusively in neurons (by using the LexAop system). In addition, upon LexA  
460 system activation, neurons are marked with membranous GFP (CD8-GFP) while the  
461 rest of the cells are wild type. Moreover, this *Wg<sup>NRT</sup>* is tagged with an HA which allows  
462 to discriminate from the endogenous Wg protein. We induced a glioma and marked the  
463 glial cells in red (ihog-RFP) (see materials and methods and Figure 8G). First, we  
464 studied normal control brains that express *Wg<sup>NRT</sup>* exclusively in neurons in the absence  
465 of glioma. We stained with anti-HA and observed a positive signal both in neurons and  
466 glial cells but not in the control without the *elav-LexA* driver, indicating that the HA

467 signal is not a false positive (Figure 8A-B, H). Finally, we performed the experiment in  
468 the glioma model to examine the interaction of glioma cells with  $Wg^{NRT}$  expressing  
469 neurons (Figure 8E-F-I) and stained with anti-HA. The images show a homogeneous  
470 signal for HA throughout the brain in glia and in neurons (See figure H-I magnifications  
471 for more detail), suggesting that glioma cells can deplete this non-  
472 secretable/membrane tethered version of Wg from neurons. We have quantified the  
473 number of HA<sup>+</sup> puncta in glia and neuron from control and glioma samples. The results  
474 suggest that glial cells are able to sequester membrane anchored  $Wg^{NRT}$  from neuronal  
475 membranes at comparable rates under both physiological and glioma conditions  
476 (Figure 8J). However, there was a detectable reduction in the number of glioma cells,  
477 similar to previous results when  $Wg/Fz1$  equilibrium in glial vs neurons was restored  
478 (Figure 7C, E and Figure 7G-H'). Since  $Wg^{NRT}$  is anchored to neuronal membranes, it  
479 would be expected to reduce the total Wg signaling in glioma cells thereby decreasing  
480 cell proliferation/survival, thus resulting in a rather normal sized brain (Figure 8A, C, E).  
481 Moreover, heterozygous  $wg^{NRT}/wg$  prevented glioma network progression (Figure  
482 8D' vs F'). In conclusion, glioma cells produce a network TMs that reach neighboring  
483 neurons, increasing intimate membrane contact that facilitates neuronal-Wg  
484 sequestering mediated by the Fz1 receptor in glioma TMs. Since  $Wg/Fz1$  signaling in  
485 glioma mediates cell number and tumor progression, targeting this cellular interaction  
486 may be a new candidate for future therapies.

487

## 488 **Discussion**

489 In addition to cell autonomous features of tumor cells, including founder mutations,  
490 recent evidences indicate that microenvironment signals contribute to glioma  
491 progression. Neuroligin-3 (NLGN3) is a synaptic protein cleaved and secreted after  
492 neuronal activity which promotes PI3K-mTOR signaling stimulating glioma growth.

493 Thus, NLGN3 mediates an autocrine/paracrine loop in glioma cells which perpetuates  
494 tumoral features <sup>71</sup> (reviewed in <sup>72</sup>). Also, neural precursor cells (NPC) from the  
495 subventricular zone (SVZ) produce chemoattractants (SPARC/SPARCL1, HSP90B and  
496 pleiotrophin) which facilitate glioma invasion of the SVZ through Rho/ROCK signaling  
497 <sup>73</sup>.

498 We showed recently that TM network formation determines GB tumor malignancy,  
499 confers radiotherapy resistance and influences patient's prognosis <sup>19</sup>. TMs stability in  
500 GB is sensitive to *GAP43* expression in tumoral cells <sup>19</sup>. Also, *Tweety homologue-1*  
501 (*TTHY1*) expression in GB cells, mediated by NLGN3 regulates TM formation <sup>74</sup>.

502 This study shows that TMs intercalate among neurons and enwrap them in  
503 perineuronal nests <sup>29</sup> structures establishing an intimate link glioma-neuron. Then GB  
504 cells make direct contact via TMs and deprive neurons of WNT.

505 Expression data from human cancer databases indicate that glioma cells do not  
506 upregulate *Wnt* expression, neither upregulate its receptors, however downstream  
507 targets of the pathway such as  $\beta$ -catenin are upregulated. Instead, the results in the fly  
508 model show that glioma cells relocate Fz1 receptor in the TMs allowing depleting Wg  
509 from neurons. Thus we use the term vampirization as the action of GB cells to exhaust  
510 or prey upon healthy cells (neurons) in the manner of a vampire, as they drain  
511 Wg/WNT and cause the demise of the neurons. Consistent with these data, in the  
512 patient-derived GB xenograft model, where WNT1 is deposited in GB cells and the  
513 WNT pathway is activated,  $\beta$ -catenin is upregulated. The available data suggest that  
514 GB TMs grow towards the source of Wg. However, as TMs expand upon Fz1/Wg  
515 signaling, the question regarding the exact order of events remains open. Do TMs  
516 require some initial stimuli from the source of Wg to grow? Alternatively, do TMs initiate  
517 growth triggered by glial internal signals and directed through a gradient of neuron-  
518 secreted attractants?

519

520 Concerning the mechanism of Wg vampirization, we have expressed a non secretable,  
521 HA- tagged version of membrane- tethered Wg<sup>NRT</sup> in neurons. In that experiment Wg is  
522 detected within glial cells demonstrating that GB cells can take Wg directly from the  
523 neuronal membrane. However, further studies are still required to determine the  
524 precise mechanism of neuronal Wg depletion by GB cells TMs.

525

526 It is widely observed that brain tumors and related ailments can cause cognitive decline  
527 and neuronal dysfunction (reviewed in <sup>75</sup>). High-grade glioma patients continue to  
528 display cognitive deficits after surgery, radiotherapy or chemotherapy <sup>76-78</sup>. The most  
529 common deficits concern memory, executive functions and general attention beyond  
530 the effects of age, education and gender <sup>79</sup>. Nevertheless, the molecules mediating  
531 neuronal degeneration need to be determined.

532

533 Synapse loss is an early step in neurodegeneration <sup>80-82</sup> which is consistent with the  
534 cognitive defects observed in GB patients. Nonetheless, cognitive defects can be  
535 observed also in patients with excess of synapses as in the case of fragile X syndrome  
536 <sup>83-84</sup>. GB cells can stimulate aberrant synapses associated with seizures <sup>85</sup> which are  
537 compatible with cognitive dysfunctions. Neuronal death is a later event in  
538 neurodegenerative processes such as Alzheimers's disease <sup>86-88</sup>. In GB patients,  
539 neuronal death is under debate and this issue should be addressed with further data.  
540 There is preclinical work <sup>88-89</sup> supporting Glioma-induced neuronal death due to  
541 glutamate cytotoxicity, in addition clinical studies from <sup>90</sup> support neuronal death in GB  
542 patients. However, it is certainly very difficult to draw clear conclusions from clinical  
543 samples or clinical courses, considering that therapy, antiepileptics and the pure space  
544 occupation plus the edema contribute to the neuronal dysfunction, degeneration and  
545 cell death.

546

547 In particular, neuronal cell loss is typically found at and around glioblastomas, and  
548 neurocognitive disturbances are a frequent finding in glioma patients. Although  
549 evidences from our experience and from neuropathology expertise, this is an open  
550 debate which requires further attention.

551

552 The data also reveal that reestablishing Wg signaling equilibrium by Fz1  
553 overexpression in neurons, not only restores synapse number but also blocks GB  
554 progression. Functional disruption of the equilibrium between GB glia and neurons is  
555 described here for the first time. Possibly, this mechanism could be valid for other  
556 molecules related to tumor progression such as Notch, Hedgehog or TGF. Moreover,  
557 cytoneme-like structures play a role in development and in other cell types<sup>91-93</sup>. Hence,  
558 we propose that cytoneme-like structures in physiological conditions and TMs in  
559 pathological GB conditions could redistribute limited amounts of signaling molecules  
560 among competing cell types, therefore long range redistribution of signaling molecules  
561 could be a general mechanism for the cells to compete for different resources.

562

563 This study integrates for the first time the oncogenic nature of glioma with the neuronal  
564 degeneration caused by Wg depletion. This innovative concept of glioma-induced  
565 neurodegeneration opens the possibility of combined treatments to fight GB  
566 progression and associated neurodegeneration at the same time. Our data  
567 demonstrate that making the neurons more competitive for secretable factors such as  
568 Wg already has an impact in GB tumor growth, although it remains to be demonstrated  
569 what type of drugs can carry out these actions.

570

571 The rapid transformation of GB cells and the heterogeneity of mutations in these  
572 tumors are a handicap for genetic therapies and monoclonal therapies. In our view,  
573 cellular features such as the network shared by GB cells emerge as an alternative to  
574 tackle tumor progression. Among the possible new strategies, TMs dynamic and

575 cellular transport of receptors to the TMs could be a target to prevent GB proliferation  
576 and neurodegeneration. GAP43 has emerged as a functional component of GB  
577 network formation. Recent studies indicate that other proteins such as Flotilin<sup>28,94</sup>,  
578 participate in cytoneme dynamics. The discovery of molecules regulating TM/cytoneme  
579 biology arises as potential targets for cancer treatment.

580

581

#### 582 **Author contributions**

583 Conceptualization, S.C.T. M.P. and FW; Methodology, S.C.T., VR, M.P., M.L.P., E.S.  
584 and N.F.; Investigation, S.C.T., FW, VR, M.P. M.L.P, E.S and N.F.; Writing – Original  
585 Draft, M.P, FW and SCT.; Writing – Review & Editing, S.C.T. and M.P.; Funding  
586 Acquisition, S.C.T and FW.; Supervision, S.C.T.

587

#### 588 **Acknowledgements**

589 We thank Professor Alberto Ferrús, Professor Helena Richardson, Dr. Paco Martín, Dr.  
590 Elena Santana, Patricia Jarabo and anonymous reviewers for critiques of the  
591 manuscript and for helpful discussions. Clemencia Cuadrado for fly stocks  
592 maintenance. We want to thank JF de Célis and C. Martínez Ostalé for their critical  
593 help with *in situ* hybridizations. We are grateful to R. Read, I. Guerrero, M. Milan, A.  
594 Baena-López, E. Martín-Blanco, David Strutt, the Vienna *Drosophila* Resource Centre,  
595 the Bloomington *Drosophila* stock Centre and the Developmental Studies Hydridoma  
596 Bank for supplying fly stocks and antibodies, and FlyBase for its wealth of information.  
597 We acknowledge the support of the Confocal Microscopy unit and Molecular Biology  
598 unit at the Cajal Institute and the *Drosophila* Transgenesis Unit at CBMSO for their help  
599 with this project. MP holds a fellowship from the Juan de la Cierva program IJCI-2014-  
600 19272 and SCT holds a contract from the Ramón y Cajal program RYC-2012-11410

601 from the Spanish MICINN. Research has been funded by grant BFU2015-65685P.

602 Authors declare no conflicts of interest.

603



## 604 **Experimental Procedures**

### 605 **Fly stocks**

606 Flies were raised in standard fly food at 25°C.

607 Fly stocks from the Bloomington stock Centre: *UAS-GFP<sup>nls</sup>* (BL4776), *UAS-lacZ*  
608 (BL8529), *UAS-myr-RFP* (BL7119), *UAS-igl-RNAi* (BL29598), *arm-GFP* (BL8555),  
609 *nkd04869a-lacZ* (BL25111), *D42-Gal4* (BL8816), *GFP-fz1-GFP* (BL59780), *repo-Gal4*  
610 (BL7415), *puc-lacZ*, *UAS-CD8-GFP* (BL32186), *tub-gal80<sup>ts</sup>* (BL7019), *elav-lexA*  
611 (*BL52676*), *lexAop-CD8-GFP* (BL32205), *lexAop-flp* (BL-55819), *UAS-armS10*  
612 (*BL4782*), *sqh-GFP* (*BL57145*), *UAS-CD4-spGFP1-10*, *lexAop-CD4-spGFP11*  
613 (obtained from BL58755), *en-Gal4*, *UAS-GFP* (from BL25752). Fly stocks from the  
614 Vienna *Drosophila* Resource Centre: *UAS-fz1-RNAi* (v105493), *fz4-GFP* (v318152),  
615 *UAS-wg-RNAi* (v104579), *UAS-yellow-RNAi* (v106068), *UAS-nrg-RNAi* (v107991).  
616 *GFP-sls* (MLC, ZCL2144 from <http://flytrap.med.yale.edu> ), *UAS-dEGFR<sup>A</sup>*, *UAS-*  
617 *PI3K92E* (dp110<sup>CAAX</sup>) (A gift from R. Read), *UAS-ihog-RFP* (a gift from I. Guerrero), *tsh-*  
618 *lacZ* and *dally-lacZ* (gifts from M. Milan), *lexAop-fz1* (generated in this study), *FRT Wg*  
619 *FRT NRT-Wg-HA*, *pax -Cherry* (a gift from A. Baena-López), *lifeactin-GFP* (a gift from  
620 I. Guerrero), for electron microscopy studies, we used the *UAS-HRP:CD2* as reporter  
621 <sup>95</sup>, *UAS-GPI-YFP* <sup>96</sup>, *UAS-GMA-GFP* <sup>97</sup>.

### 622 ***Drosophila* glioblastoma model**

623 The most frequent genetic lesions in human gliomas include mutation or amplification  
624 of the Epidermal Growth Factor Receptor (EGFR) gene. Glioma-associated EGFR  
625 mutant forms show constitutive kinase activity that chronically stimulates Ras signaling  
626 to drive cell proliferation and migration <sup>98-99</sup>. Other common genetic lesions include loss  
627 of the lipid phosphatase PTEN, which antagonizes the phosphatidylinositol-3 kinase  
628 (PI3K) signaling pathway, and mutations that activate PI3KCA, which encodes the  
629 p110a catalytic subunit of PI3K <sup>98-99</sup>. Gliomas often show constitutively active Akt, a  
630 major PI3K effector. However, EGFR-Ras or PI3K mutations alone are not sufficient to

631 transform glial cells. Instead, multiple mutations that coactivate EGFR-Ras and  
632 PI3K/Akt pathways are required to induce a glioma<sup>29</sup>. In *Drosophila*, a combination of  
633 EGFR and PI3K mutations effectively causes a glioma-like condition that shows  
634 features of human gliomas including glia expansion, brain invasion, neuron  
635 dysfunction, synapse loss and neurodegeneration<sup>24,100-101</sup>. Moreover, this model has  
636 proved to be useful in finding new kinase activities relevant to glioma progression.<sup>25</sup> To  
637 generate a glioma in *Drosophila melanogaster* adult flies, we used the Gal4/UAS  
638 system<sup>102</sup> as described above (*repo-Gal4>UAS-EGFR $\lambda$ ,UAS-dp110*). To restrict the  
639 expression of this genetic combination to the adulthood, we used the thermo sensitive  
640 repression system Gal80<sup>TS</sup>. Individuals maintained at 17°C did not activate the  
641 expression of the UAS constructs, but when flies were switched to 29°C, the protein  
642 Gal80<sup>TS</sup> changed conformation and was not longer able to bind to Gal4 to prevent its  
643 interaction with UAS sequences, and the expression system was activated.

#### 644 **Generation of Transgenic flies**

645 *LexAop-Frizzled1* construct was generated by RECOMBINA S.L. Fz1 (CG17697) CDS  
646 was synthesized by overlapping g-block assembly. The complete 17665bp fragment  
647 was amplified using the high fidelity Phusion taq polymerase (Thermo fisher Scientific)  
648 and *Eco.Friz.Fw* and *Xba.Friz.Rv* primers. PCR amplicon was cloned in pJET entry  
649 vector (Thermo Fisher Scientific), then Frizzled fragment was released with *EcoRI/XbaI*  
650 restriction enzymes and sub-cloned into destination *pLOTattB* plasmid.

651 *Eco.Fz1.Fw* 5'-GAATTGGGAATTCATGTGGCGTCAAATCCTG-3'

652 *Xba.Fz1.Rv* 5'-TCTAGACTAGACGTACGCCTGCGCCC-3'

653 Transgenic flies were injected and *Frizzled1* fragment was inserted in the chromosome  
654 2L by the *Drosophila* microinjection service (CBMSO-CSIC) using the following stock:  
655 *y[1] M{vas-int.Dm}ZH-2A w[\*]; M{3xP3-RFP.attP}ZH-22A* (BL24481). Transgenic flies  
656 were selected individually by eye color (w+) and balanced with *CyO*.

657

## 658 **Antibodies for Immunofluorescence**

659 Third-instar larval brains, were dissected in phosphate-buffered saline (PBS), fixed in  
660 4% formaldehyde for 30min, washed in PBS + 0.1 or 0.3% Triton X-100 (PBT), and  
661 blocked in PBT + 5% BSA.

662 Antibodies used were: mouse anti-Wg (DSHB 1:50), mouse anti-Repo (DSHB 1:50),  
663 mouse anti-Fz1 (DSHB 1:50), mouse anti-Fz2 (DSHB 1:50), Rabbit anti-Fz1<sup>103</sup>, 1:300),  
664 mouse anti-Arm (DSHB 1:50), mouse anti- $\beta$ -galactosidase (Sigma, 1:500), rabbit anti-  
665 GFP (Invitrogen A11122, 1:500), mouse anti-GFP (Invitrogen A11120, 1:500), mouse  
666 anti-Nc82 (DSHB 1:20), mouse anti-ELAV (DSHB 1:50), Rabbit anti-Hrp (Jackson  
667 Immunoresearch 111-035-144, 1:400) , mouse anti-HA (12CA5 Roche 11583816001  
668 1:100), rat anti-HA (Roche 11867423001, 1:200).

669 Secondary antibodies: anti-mouse Alexa 488, 647, anti-rabbit Alexa 488, 647  
670 (Thermofisher, 1:500). DNA was stained with 2-(4-amidinophenyl)-1H-indole-6-  
671 carboxamide (DAPI, 1 $\mu$ M).

672

## 673 **Cell culture, fixation and histology of S24 Xenograft model**

674 The S24 cell line was derived as a primary glioblastoma culture (Lemke et al., 2012;  
675 Osswald et al., 2015). For the S24 glioma model, 50.000 S24:GFP cells (stably  
676 transduced by lentivirus) were injected into the cortex in 8-10 week old male NMRI  
677 nude mice (Charles River, Sulzfeld, Germany, n=2). Cells were cultivated under serum-  
678 free conditions in DMEM-F12 as sphere cultures (Thermo Fisher Scientific Inc.,  
679 Waltham, MA, USA) supplemented with 2% B-27 (Thermo Fisher Scientific Inc.,  
680 Waltham, MA, USA), 5  $\mu$ g/ml human insulin (Sigma-Aldrich Corporation, St. Louis, MO,  
681 USA), 12.8 ng/ml heparin (Sigma-Aldrich), 0.4 ng/ml EGF (R&D Systems Inc.,  
682 Minneapolis, MN, USA) and 0.4 ng/ml FGF (Thermo Fisher Scientific Inc., Waltham,

683 MA, USA). Animals were sacrificed 90 days after glioma cell injection with age-  
684 matched wild-type NMRI nude mice (n=2) which were used as control.

685 Brains were fixed with transcardial perfusion with 40 ml PBS and 40 ml 4 % PFA. The  
686 brain was removed and postfixed in 4 % PFA for 4 hrs at room temperature. Afterwards  
687 the brains were stored in PBS at 4 °C in the dark.

688 For histology, S24:GFP tumor-bearing brains were coronally cut on a vibratome  
689 (Sigmann Elektronik, Hüffenhardt, Germany) into 100 µm sections. The sections were  
690 permeabilized with 1 % TX100 for 3 hrs and counterstained with primary antibodies  
691 against beta-catenin (abcam, ab32572) and WNT1 (abcam, ab15251) for 3 hrs in 0.2%  
692 TX100 and 5 % FCS. Sections were washed three times with 0.2% TX100 and 5 %  
693 FCS and counterstained with secondary antibodies couples to Alexa-647 and Alexa-  
694 546 (Invitrogen) as well as DAPI for 3 hrs. The sections were washed three times in 1 ×  
695 PBS, pH=7.4, and mounted on coverslips using self-made moviol. Images were  
696 acquired on a confocal laser-scanning microscope (Leica SP8, Leica, Germany) using  
697 a × 63 immersion oil objective (numeric aperture=1.4). z-Stacks were acquired with a  
698 pixel size of 141 nm and 300-nm z-steps.

699 All animal experiments were approved by the regional animal welfare committee  
700 (permit number: G132/16 Regierungspräsidium Karlsruhe).

## 701 **Western blots**

702 For western blots, we used NuPAGE Bis-Tris Gels 4–12% (Invitrogen), and the  
703 following primary antibodies: mouse anti-Fz1 (DSHB 1:500), mouse anti-Fz2 (DSHB  
704 1:500) and mouse anti-tubulin (1:10,000 Sigma), we use Tubulin as a loading control  
705 instead of actin because the tumor microtubes are Actin positive and tubulin negative  
706 as previously described <sup>19</sup>. There were 3 biological replicates and Relative Fz1  
707 Average pixel intensity was measured using measurement tool from Image Studio Lite  
708 Ver 5.2 and normalized against Tubulin.

709

### 710 **Proximity ligation assay**

711 DUO92101 Duolink® In Situ Red Starter Kit Mouse/Rabbit with DUO92013 Duolink In  
712 Situ Detection Reagents FarRed (Sigma).

713 The interaction between Wg and Fz1 in *Drosophila* larval brains was detected *in situ*  
714 accordingly to the instructions of the manufacturer. Briefly, primary antibody incubation  
715 against Wg (mouse anti-Wg (DSHB 1:50) and Fz1 (Rabbit anti-Fz1<sup>103</sup>, 1:300)) were  
716 applied using the same conditions as immunocytochemistry staining. Duolink  
717 secondary antibodies against the primary antibodies were then added. These  
718 secondary antibodies were provided as conjugates to oligonucleotides that were able  
719 to form a closed circle via base pairing and ligation using Duolink ligation solution when  
720 the antibodies were in close proximity<sup>49</sup> at a distance estimated to be <40 nm. The  
721 detection of the signals was conducted by rolling circle amplification using DNA  
722 polymerase incorporating fluorescently labeled nucleotides into the amplification  
723 products. The resulting positive signals were visualized as bright fluorescent dots, with  
724 each dot representing one interaction event. As negative control one of the primary  
725 antibodies was not added therefore, no positive signals were obtained from that assay).  
726 The tissues were visualized using a confocal microscope system (LEICA TCS SP5).

727

### 728 **In situ hybridizations**

729 Protocol was performed according to<sup>104</sup>. Imaginal discs and brains were dissected and  
730 fixed in 4% formaldehyde for 20 min at room temperature, washed in PBS-0.1% Tween  
731 (PBT) and re-fixed for 20 min at room temperature with 4% formaldehyde and 0.1%  
732 Tween. After three washes in PBT, discs were stored at -20°C in hybridization solution  
733 (HS; 50% formamide, 5× SSC, 100 µg/ml salmon sperm DNA, 50 µg/ml heparin and  
734 0.1% Tween). Disc were pre-hybridized for 2 h at 55°C in HS and hybridized with  
735 digoxigenin-labelled RNA probes at 55°C. The probes were previously denaturalized at  
736 80°C for 10 min. After hybridization, discs were washed in HS and PBT, and

737 incubated for 2 h at room temperature in a 1:4000 dilution of anti-DIG antibody  
738 (Roche). After incubation, the discs were washed in PBT and the detection of probes  
739 was carried out using NBT and BCIP solution (Roche). The discs were mounted in 70%  
740 glycerol. Images were acquired with a Leica DM750 microscope and Leica MC170HD  
741 camera and LASv4.8 software. The probes were generated from the cDNAs RE026007  
742 (*wg*) and LD32066 (*fz1*) from the Expression Sequence Tags (EST) collection of the  
743 Berkeley Drosophila Genome Project.

744

#### 745 **TEM**

746 Transmission electron microscopy (TEM) was performed in CNS of 3rd instar larvae  
747 with horseradish peroxidase (HRP) genetically driven to glial cells. Brains were fixed in  
748 4% formaldehyde in PBS for 30 min at room temperature, and washed in PBS,  
749 followed by an amplification of HRP signal using the ABC kit (Vector Laboratories) at  
750 room temperature. After developing with DAB brains were washed with PBS and fixed  
751 with 2% glutaraldehyde, 4% formaldehyde in PBS for 2h at room temperature. After  
752 washing in phosphate buffer the samples were postfixed with OsO<sub>4</sub> 1% in 0.1 M  
753 phosphate buffer, 1% K<sub>3</sub>[Fe(CN)<sub>6</sub>] 1h at 4°C. After washing in dH<sub>2</sub>O, Brains were  
754 incubated with tannic acid in PBS for 1min at room temperature then washed in PBS  
755 for 5min and dH<sub>2</sub>O 2x5min. Then the samples were stained with 2% uranyl acetate in  
756 H<sub>2</sub>O for 1h at room temperature in darkness followed by 3 washes in H<sub>2</sub>O<sub>2</sub>d. . Brains  
757 dehydrated in ethanol series (30%, 50%, 70%, 95%, 3x100% 10 min each at 4°C).  
758 Infiltration: samples were incubated in EtOH : propylene's OXID (1:1;V.V) for 5 min,  
759 propylene's OXID 2x10min, propylene's OXID:Epon (1:1) for 45 min, Epon 100% in  
760 agitation for 1 h and Epon 100% in agitation overnight. Then change to Epon 100% for  
761 2-3 h. Finally encapsulate the samples in BEEM capsules and polymerize 48h at  
762 60°C<sup>105</sup>.

763

#### 764 **Imaging**

765 Fluorescent labeled samples were mounted in Vectashield mounting media with DAPI  
766 (Vector Laboratories) and analyzed by Confocal microscopy (LEICA TCS SP5/SP8).  
767 Images were processed using Leica LAS AF Lite and Fiji (Image J 1.50e). Images were  
768 assembled using Adobe Photoshop CS5.1.

769

## 770 **Quantifications and Statistical Analysis**

771 Relative Wg, Fz1, Arm, WNT1 and  $\beta$ Catenin staining within brains was determined  
772 from images taken at the same confocal settings. Average pixel intensity was  
773 measured using measurement log tool from Fiji 1.51g and Adobe Photoshop CS5.1.  
774 Average pixel intensity was measured in the glial tissue and in the adjacent neuronal  
775 tissue (N $\sim$ 10 for each sample) and expressed as a ratio. Total average pixel intensity  
776 of WNT1 and  $\beta$ Catenin staining within mice brains was measured in the glioma (N=6)  
777 and control samples (N=6), to quantify this, single sections were taken from similar z-  
778 positions in both control and glioma samples. Glial network volume was quantified  
779 using Imaris surface tool (Imaris 6.3.1 software). The number of Proximity ligation  
780 assay puncta, HA<sup>+</sup> puncta, Repo<sup>+</sup> cells and the number of synaptic active sites was  
781 quantified by using the Imaris 6.3.1 software.

782 The Western Blot bands were quantified by using the Image Studio Lite 5.2 software.  
783 Data was analyzed and plotted using GraphPad Prism v7.0.0. A D'Agostino & Pearson  
784 normality test was performed and the data found to have a normal distribution were  
785 analyzed by a two-tailed t-test with Welch-correction. In the case of multiple  
786 comparisons a One-way ANOVA with bonferroni post test was used. The data that did  
787 not pass the normality test were submitted to a two-tailed Mann-Whitney U-test or in  
788 the case of multiple comparisons a Kruskal-Wallis test with Dunns post test. Error bars  
789 represent Standard Error of the Mean, significance was \*\*\*p $\leq$ 0.0001, \*\* p $\leq$ 0.001 \*  
790 p $\leq$ 0.01, ns=non-significant.

791

792

## 793 **Viability assays**

794 Flies were crossed and progeny was raised at 25°C under standard conditions. The  
795 number of adult flies emerged from the pupae were counted for each genotype. The  
796 number of control flies was considered 100% viability and all genotypes are  
797 represented relative to controls. Experiments were performed in triplicates.

## 798 **Survival assay**

799 Males *Tub-Gal80; Repo-Gal4* were crossed with males bearing a control construct  
800 (*UAS-LacZ*) or glioma (*UAS-PI3K<sup>dp110</sup>; UAS-EGFR<sup>Δ</sup>*) and raised at 17°C. Progeny  
801 bearing a glioma (experimental) or LacZ (control) chromosomes were put at 29°C and  
802 viability was calculated as the percentage of surviving flies with respect to the starting  
803 number of flies as follows: viability = observed (n° of flies)/starting n° of flies × 100. Six  
804 independent vials for glioma (*n*= 6) and control (*n*= 6) were analyzed, with each vial  
805 with 10 flies.

806

## 807 **qRT-PCRs**

808 Total RNA was isolated from larvae brains (Trizol, Invitrogen) and cDNAs were  
809 synthesized with M-MLV RT (Invitrogen). The following specific probes from Applied  
810 Biosystems were used: Wingless Dm01814379\_m1 and Frizzled1 Dm01793718\_g1,  
811 Rpl32 Dm02151827\_g1 was used as housekeeping.

812 qRT-PCR was performed using Taqman Gene Expression (Applied Biosystems) using  
813 a 7500 Real Time PCR System (Applied Biosystems) with cycling conditions of 95°C  
814 for 10 min and 40 cycles of 95°C for 15 s and 55°C for 1 min. Each experimental point  
815 was performed with samples from two independent crosses and three replicates per  
816 experimental point, and differences were assessed with a 2-tailed Student *t* test.  
817 Results were normalized using the housekeeping Rpl32 and the  $\Delta\Delta$  cycle threshold  
818 method and are expressed as the relative change (-fold) of the stimulated group over



819 the control group, which was used as a calibrator. qRT-PCR results were analyzed with  
820 7500 v2.0.6 software (Applied Biosystems).

821

## 822 **Figure Legends**

### 823 **Figure 1: Co-activation of EGFR-Ras and PI3K in *Drosophila* glia causes an** 824 **expansion of the glial network**

825 Brains from 3rd instar larvae. Glia nuclei are labeled with GFP<sup>NLS</sup> (green) driven by  
826 *repo-Gal4*. Each brain is composed of 2 symmetrical hemispheres. (A-C) In  
827 *repo>dEGFR<sup>Δ</sup>; dp110<sup>CAAX</sup> (glioma)* larvae (B), both brain hemispheres are enlarged and  
828 elongated and the number of glial cells is increased relative to *wt* control (A). Lower  
829 magnifications are shown in A' and b'. The quantification of the number of glial cells is  
830 shown in (C). Arrows indicate glial nuclei.

831 (D–E) Optical sections of larval brain to visualize the glial network, glial cell bodies and  
832 membranes are labeled in red (myrRFP). (D) RFP signal in control brains shows glial  
833 somas and the network in *wt* brain. (E) The glioma brain shows a dramatic increase in  
834 the membrane projections and in the size of the network. Nuclei are marked with DAPI  
835 (blue).

836 (F-L) Transmission electron microscopy (TEM) images of a 3rd instar larval brains  
837 expressing HRP in the glial cells. (F-G) HRP deposits label cell profiles membranes in  
838 dark, thus identifying glial cells. Coloured images from control brains showing glial cells  
839 identified by HRP staining (magenta) and HRP-negative neurons (cyan). (H) Schematic  
840 diagram, a glioma cell labeled with HRP (magenta) showing that glioma cells produce a  
841 network of TMs that grow to surround neighboring neurons (cyan). (I-L) Several  
842 magnifications of Glioma brains showing TMs that grow and enwrap neighboring

843 neurons (cyan). Detail of several layers of a glioma membrane enwrapping a neuron  
844 (K-L) and a longitudinal section of a TM (J), arrows indicate glial membranes.

845 (M-P) Glia are labeled with *UAS-ihog-RFP* to visualize active cytoneme/TM structures  
846 in glial cells as part of an interconnecting network. (M) In control brains the active glial  
847 cytonemes are shown by *repo>ihog-RFP* in red. In glioma brains (N), the TMs grow  
848 and expand across the brain, quantification of the network volume (O) and the  
849 network/glial cell ratio is shown in P.

850 (Q) Glia is labeled with *UAS-ihog-RFP* driven by *repo-Gal4* to visualize TMs in glial  
851 cells, nuclei are marked with DAPI (blue) and Neurons are stained in green (Hrp) and  
852 enwrapped by glial TMs in glioma brains ( yellow arrowheads). (R) Glia is labeled with  
853 *UAS-myr-RFP* driven by *repo-Gal4* to visualize membrane projections in glial cells,  
854 nuclei are marked with DAPI (blue) and Neurons are stained in green (ELAV) and  
855 enwrapped by glial TMs in glioma brains ( yellow arrowheads). Error bars show S.D. \*\*\*  
856  $P < 0.0001$ . Scale bar size are indicated in this and all figures. Genotypes: (A) *w; repo-*  
857 *Gal4, UAS-GFP<sup>nlis</sup>/UAS-lacZ*, (B) *UAS-dEGFR<sup>Δ</sup>, UAS-dp110<sup>CAAX</sup>::; repo-Gal4, UAS-*  
858 *GFP<sup>nlis</sup>*, (D) *w; Gal80<sup>ts</sup>; repo-Gal4, UAS-myrRFP/UAS-lacZ*, (E, R) *UAS-dEGFR<sup>Δ</sup>, UAS-*  
859 *dp110<sup>CAAX</sup>; Gal80<sup>ts</sup>; repo-Gal4, UAS-myrRFP*, (F-G) *w; UAS-HRP:CD2; repo-*  
860 *Gal4/UAS-lacZ*, (I-L) *UAS-dEGFR<sup>Δ</sup>, UAS-dp110<sup>CAAX</sup>; UAS-HRP:CD2; repo-Gal4*, (M)  
861 *w;; repo-Gal4, UAS-ihog-RFP/UAS-lacZ*, (N, Q) *UAS-dEGFR<sup>Δ</sup>, UAS-dp110<sup>CAAX</sup>::; repo-*  
862 *Gal4, UAS-ihog-RFP*

863

## 864 **Figure 2: Wingless/Fz1 accumulate in glioma cells**

865 Larval brain sections with glial cell bodies and membranes labeled in red (myrRFP) and  
866 stained with Wg antibody show homogeneous expression in the control brains (A) in  
867 green. In the glioma brains Wg accumulates in the glial transformed cells (B), the Wg  
868 average pixel intensity ratio between Glia/Neuron quantification is shown in (C). Arrows

869 indicate Wg staining in glial membranes. (D-F) Glial cells are labeled with *UAS-Ihog-*  
870 *RFP* to visualize the glial network, and stained with Fz1 (green). (D) Fz1 is  
871 homogeneously distributed in control brains, with a slight accumulation in the Ihog+  
872 structures. (E) Fz1 accumulates in the TMs and specifically in the projections that are  
873 in contact with the neuronal clusters. (F) Upon knockdown of *fz1* in glioma brains, the  
874 tumoral glial network is still formed but Fz1 is not detectable. (G) Knockdown of *igl* in  
875 glioma brains restores a normal glial network and Fz1 shows a homogeneous  
876 distribution along the brain section. Arrows indicate Fz1 staining in glial membranes.  
877 (H) Fz1 average pixel intensity ratio between Glia/Neuron quantification  $\bar{\phantom{x}}$ . Nuclei are  
878 marked with DAPI. Error bars show S.D. \* P<0.01 \*\*\* P<0.0001. Genotypes: (A) *w;*  
879 *Gal80<sup>ts</sup>; repo-Gal4, UAS-myrRFP/UAS-lacZ*, (B) *UAS-dEGFR<sup>Δ</sup>, UAS-dp110<sup>CAAX</sup>;*  
880 *Gal80<sup>ts</sup>; repo-Gal4, UAS-myrRFP*, (C) *w;; repo-Gal4, ihog-RFP/UAS-lacZ*, (D) *UAS-*  
881 *dEGFR<sup>Δ</sup>, UAS-dp110<sup>CAAX</sup>;; repo-Gal4, UAS-ihog-RFP*, (E) *UAS-dEGFR<sup>Δ</sup>, UAS-*  
882 *dp110<sup>CAAX</sup>; UAS-Fz1-RNAi; repo-Gal4, UAS-ihog-RFP*, (F) *UAS-dEGFR<sup>Δ</sup>, UAS-*  
883 *dp110<sup>CAAX</sup>;; repo-Gal4, UAS-ihog-RFP /UAS-igl-RNAi*

884

### 885 **Figure 3: Fz1 in glia interacts with neuronal Wg**

886 GRASP technique was used and both halves of green fluorescent protein tagged with a  
887 CD4 signal to direct it to the membranes (CD4-spGFP) were expressed in neurons  
888 (*elav-lexA*) and glial (*repo-Gal4*) cells respectively. Only upon intimate contact GFP  
889 protein is reconstituted and green fluorescent signal is visible. (A-C) Control brains  
890 showed a discrete signal corresponding to the physiological interaction between glia  
891 and neurons. (D-F) In glioma brains a massive GFP signal from GRASP reporter is  
892 detected. Arrows indicate GRASP reconstitution GFP signal. (G-H) Proximity ligation  
893 assays (PLA) were performed in control and glioma brains to quantify the interactions  
894 between Wg and Fz1. (G) Control brains showed a discrete number of puncta (green)

895 showing the physiological interactions. (H) Glioma brains showed a five-fold increase in  
896 the number of puncta, quantified in (I). The number of PLA+ Wg-Fz1 interactions per  
897 Repo+ cell in control and glioma brains is shown in (J). Nuclei are marked with DAPI  
898 (blue). Arrows indicate PLA<sup>+</sup> puncta. Error bars show S.D. \*\*\* P<0.0001. Genotypes:  
899 (A-C) *w*; *elav-lexA*; *repo-Gal4*, *UAS-ihog-RFP/UAS-CD4-spGFP1-10*, *lexAop-CD4-*  
900 *spGFP11*, (D-F) *UAS-dEGFR<sup>Δ</sup>*, *UAS-dp110<sup>CAAX</sup>*; *elav-lexA*; *repo-Gal4*, *UAS-ihog-RFP/*  
901 *UAS-CD4-spGFP1-10*, *lexAop-CD4-spGFP11*, (G) *w*; *repo-Gal4*, *ihog-RFP/UAS-lacZ*,  
902 (H) *UAS-dEGFR<sup>Δ</sup>*, *UAS-dp110<sup>CAAX</sup>*; *repo-Gal4*, *UAS-ihog-RFP*

903

904 **Figure 4: Wg signaling pathway is active in glioma cells, and the glioma**  
905 **inactivates it in neuronal clusters in glioma brains.**

906 Larval brain sections with glial cytonemes labeled in red and stained with Arm (green).  
907 (A) Cytoplasmic-Armadillo (Cyt-Arm) is homogeneously distributed in control sections.  
908 (B) In glioma brains Cyt-Arm accumulates in the neurons cytoplasm where it is inactive.  
909 (C) Knockdown of *igl* in glioma brains restores a normal glial network and Arm does not  
910 accumulate showing a homogeneous distribution similar to the control. Arrows indicate  
911 Cyt-Arm staining at the Glia-neuron interphase. (D) Cyt-Arm average pixel intensity  
912 ratio between Neuron/Glia quantification showing the Wg signaling pathway silencing in  
913 neurons in a glioma brain. Glial cell bodies and membranes are labeled with myrRFP  
914 (red). (E-H) Wg signaling pathway reporters *arm-GFP* (E-F) and *nkd-lacZ* (stained with  
915 anti-bGal (G-H) in control and glioma brains show activation of the pathway in glioma  
916 cells compared with the reporter activation mostly in neurons in the control brains.  
917 Arrows indicate cells with reporter activation. (I-N) Confocal immunofluorescence single  
918 plane images of S24 GBSC NMRI nude mice brains (glioma) and NMRI nude mice  
919 (control) brains stained with human anti-βCatenin (I-J) and WNT1 (L-M) both show in  
920 grey (red in the merged image) an increase in the glioma samples. The corresponding

921 quantification of the pixel intensity is shown in K and N. Green signal from tumor cell  
922 GFP expression allows specific detection of S24 GBSC related structures in the mouse  
923 brain (I', L'). Arrows indicate glioma or control cells. Nuclei are marked with DAPI.  
924 Error bars show S.D. \*\*\* P<0.0001 and ns for non-significant. Genotypes: (A) *w;; repo-*  
925 *Gal4, ihog-RFP/UAS-lacZ*, (B) *UAS-dEGFR<sup>Δ</sup>, UAS-dp110<sup>CAAX</sup>;; repo-Gal4, UAS-ihog-*  
926 *RFP*, (C) *UAS-dEGFR<sup>Δ</sup>, UAS-dp110<sup>CAAX</sup>;; repo-Gal4, UAS-ihog-RFP /UAS-igl-RNAi*,  
927 (E) *w; Gal80<sup>ts</sup>; repo-Gal4, UAS-myrRFP/ arm-GFP*, (F) *UAS-dEGFR<sup>Δ</sup>, UAS-dp110<sup>CAAX</sup>;*  
928 *Gal80<sup>ts</sup>; repo-Gal4, UAS-myrRFP/ arm-GFP*, (G) *w; Gal80<sup>ts</sup>; repo-Gal4, UAS-*  
929 *myrRFP/nkd04869a-lacZ*, (H) *UAS-dEGFR<sup>Δ</sup>, UAS-dp110<sup>CAAX</sup>; Gal80<sup>ts</sup>; repo-Gal4, UAS-*  
930 *myrRFP/nkd04869a-lacZ*

931

932 **Figure 5: Glioma network is responsible for the increase in the number of glial**  
933 **cells.**

934 Larval brain sections with glial cell nuclei stained with Repo (green). The number of  
935 glial cells is quantified in the following genotypes: (A) Control, (B) Glioma showing an  
936 increase in Repo+ cells. (C) Upon knockdown of *Fz1* in glioma brains, the number of  
937 glial cells is partially restored (D) knockdown of *igl* in glioma brains restores the number  
938 of glial cells similar to the control. (E) Quantification of the number of Repo+ cells.  
939 Nuclei are marked by DAPI (blue). (F) Viability assay showing the % lethality induced  
940 by the glioma that is partially rescued upon knockdown of *fz1*. Error bars show S.D. \*\*\*  
941 P<0.0001, and ns for non-significant. Genotypes: (A) *w;; repo-Gal4, ihog-RFP/UAS-*  
942 *lacZ*, (B) *UAS-dEGFR<sup>Δ</sup>, UAS-dp110<sup>CAAX</sup>;; repo-Gal4, UAS-ihog-RFP*, (C) *UAS-dEGFR<sup>Δ</sup>,*  
943 *UAS-dp110<sup>CAAX</sup>; UAS-Fz1-RNAi; repo-Gal4, UAS-ihog-RFP*, (D) *UAS-dEGFR<sup>Δ</sup>, UAS-*  
944 *dp110<sup>CAAX</sup>;; repo-Gal4, UAS-ihog-RFP /UAS-igl-RNAi*, (F) 1. *w;; repo-Gal4, ihog-*  
945 *RFP/UAS-lacZ* 2. *w; UAS-fz1-RNAi; repo-Gal4, UAS-ihog-RFP* 3. *UAS-dEGFR<sup>Δ</sup>, UAS-*

946 *dp110<sup>CAAX</sup>; repo-Gal4, UAS-ihog-RFP* 4. *UAS-dEGFR<sup>Δ</sup>, UAS-dp110<sup>CAAX</sup>; UAS-fz1-*  
947 *RNAi; repo-Gal4, UAS-ihog-RFP*

948

949 **Figure 6: Gliomas cause Neurodegeneration and Wg expression in glioma cells**  
950 **is dispensable for tumor progression**

951 Neurons from the larval neuromuscular junction are stained with Nc82 showing the  
952 synaptic active zones. (A-F) Upon glioma induction (B) the number of synapses (grey)  
953 is reduced when compared with the control (A). The number of synapses is restored  
954 upon knockdown of *Fz1* (C), *igl* (D) or *armS10*; *Fz1-RNAi* (E). The quantification of  
955 synapse number in all genotypes is shown in (F). (G-L) *wg* knockdown (I) in glioma  
956 cells (*wg-RNAi*) or *armS10*; *Fz1-RNAi* (J) does not prevent glioma cell numbers  
957 increase nor glioma TMs volume expansion quantified in (K-L). Error bars show S.D.  
958 \*\*\* P<0.0001, \*\* P<0.001 and ns for non-significant. Genotypes: (A, G) *w*; *repo-Gal4*,  
959 *ihog-RFP/UAS-lacZ*, (B, H) *UAS-dEGFR<sup>Δ</sup>, UAS-dp110<sup>CAAX</sup>; repo-Gal4, UAS-ihog-RFP*,  
960 (C) *UAS-dEGFR<sup>Δ</sup>, UAS-dp110<sup>CAAX</sup>; UAS-Fz1-RNAi; repo-Gal4, UAS-ihog-RFP*, (D)  
961 *UAS-dEGFR<sup>Δ</sup>, UAS-dp110<sup>CAAX</sup>; repo-Gal4, UAS-ihog-RFP /UAS-igl-RNAi*, (E, J) *UAS-*  
962 *arm<sup>S10</sup>/UAS-dEGFR<sup>Δ</sup>, UAS-dp110<sup>CAAX</sup>; UAS-Fz1-RNAi; repo-Gal4, UAS-ihog-RFP*, (I)  
963 *UAS-dEGFR<sup>Δ</sup>, UAS-dp110<sup>CAAX</sup>; UAS-wg-RNAi; repo-Gal4, UAS-ihog-RFP*

964

965 **Figure 7: Knockdown of the Wg signaling pathway results in neurodegeneration**  
966 **and restoration of the glia-neuron Wg/Fz1 signaling equilibrium inhibits glioma**  
967 **progression.**

968 Neurons from the larval neuromuscular junction are stained with Nc82 showing the  
969 synaptic active Zones. (A-D) Upon knockdown of *wg* (C) or *Fz1* in D42 neurons (B) the  
970 number of synapses (grey) is reduced when compared with the control (A). Arrows

971 indicate synapses. The quantification of synapse number in all genotypes is shown in  
972 (D).

973 (E-H) Larval brain sections with glial network labeled with *UAS-Ihog-RFP* in red and  
974 stained with Fz1 (grey or blue in the merge). Neurons are labeled with *lexAop-CD8-*  
975 *GFP* driven by *elav-lexA*. Fz1 overexpression in neurons (green) restore homogeneous  
976 Fz1 protein distribution (blue) in the brain, rescue brain size and neuron distribution (G  
977 and magnification in H) compared to (E and magnification in F) where the *elav-lexA* is  
978 not present in the glioma brains, Nuclei are marked with DAPI in (E-F) (green). Arrows  
979 indicate Fz1 staining in the glial membranes at the Glia-neuron interphase of glioma  
980 brains and its restored localization in G-H.

981 (I-L) Neurons from the larval neuromuscular junction are stained with Nc82 showing the  
982 active Zones. Upon glioma induction the number of synapses (grey) is reduced (J)  
983 when compared with the control (I). The number of synapses is restored upon  
984 overexpression of Fz1 specifically in the neurons (K). Arrows indicate synapses. The  
985 quantification of synapse number is shown in (L). Error bars show S.D. \*\*\* P<0.0001, \*  
986 P<0.01 or ns for non-significant. Genotypes: (A) *w; UAS-CD8-GFP; D42-Gal4/UAS-*  
987 *lacZ*, (B) *w; UAS-CD8-GFP/Fz1-RNAi; D42-Gal4*, (C) *w; UAS-CD8-GFP/wg-RNAi;*  
988 *D42-Gal4*, (E-F, J) *UAS-dEGFR<sup>Δ</sup>, UAS-dp110<sup>CAAX</sup>; lexAop-Fz1; repo-Gal4, UAS-ihog-*  
989 *RFP*, (G-H, K) *UAS-dEGFR<sup>Δ</sup>, UAS-dp110<sup>CAAX</sup>; lexAop-fz1/ elav-lexA, lexAop-CD8-GFP;*  
990 *repo-Gal4, UAS-ihog-RFP*, (l) *w; repo-Gal4, ihog-RFP/UAS-lacZ*

991

## 992 **Figure 8: Glioma depletes Wg from neuronal membrane**

993

994 Larval brain sections with glial network labeled with *UAS-Ihog-RFP* in red and stained  
995 with HA (blue). (A, magnification in B, H) Control brains express *Wg<sup>NRT</sup>-HA* and the  
996 anti-HA (grey or blue in the merge) staining shows a positive signal in both neurons

997 (green) and glial cells (red). (C-D) Glioma samples that do not express Wg<sup>NRT</sup> in  
998 neurons do not show HA nor GFP signal. (E, magnification in F, I) Glioma brains with  
999 membrane anchored Wg (Wg<sup>NRT</sup>-HA grey or blue in the merge) in neurons (green),  
1000 show a homogeneous signal for HA (grey or blue in the merge) in both glioma cells and  
1001 neurons, quantified in (J), and the glial network volume size is restored in these  
1002 animals (K). Arrows indicate HA<sup>+</sup> staining in glial or neuronal membranes. Error bars  
1003 show S.D. \*\*\* P<0.0001, ns for non-significant. (G) Schematic diagram of this  
1004 experiment: a neuron labeled with GFP (green) and a glioma cell labeled with ihog-  
1005 RFP (red) showing that glioma cells produce a network of TMs that grow to reach  
1006 neighboring neurons. Intimate membrane contact facilitates neuronal-Wg (blue)  
1007 sequestering mediated by Fz1 receptor (black) from glioma. In this experiment neurons  
1008 express a membrane anchored version of Wg (Wg<sup>NRT</sup> represented as Wg in blue with a  
1009 purple anchor) which is more difficult for the glioma to retrieve from the neuron.  
1010 Genotypes: (A-B, H) *w; >wg>wgNRT-HA, PaxRFP/ elav-lexA, lexAop-CD8-GFP; repo-*  
1011 *Gal4, UAS-ihog-RFP/lexAop-flp*, (C-D) *UAS-dEGFR<sup>Δ</sup>, UAS-dp110<sup>CAAX</sup>; >wg>wgNRT-*  
1012 *HA, PaxRFP ; repo-Gal4, UAS-ihog-RFP/lexAop-flp*, (E-F, I) *UAS-dEGFR<sup>Δ</sup>, UAS-*  
1013 *dp110<sup>CAAX</sup>; >wg>wgNRT-HA, PaxRFP/ elav-lexA, lexAop-CD8-GFP; repo-Gal4, UAS-*  
1014 *ihog-RFP/lexAop-flp*

1015

1016 **Supplementary Figures and Videos Figure S1 (Related to Figure 1): TMs enwrap**  
1017 **neurons in GB and cytoneme markers co-localize with glioma network**

1018 (A-B) Control and glioma brains from 3rd instar larvae. Glia is labeled with *UAS-Ihog-*  
1019 *RFP* driven by *repo-Gal4* to visualize TMs in glial cells as part of an interconnecting  
1020 network (red). Glial network is marked with lifeActin-GFP reporter (green) and nuclei  
1021 are marked with DAPI (blue). Imaris 3D reconstructions are shown in A'''-B'''.



1022 (C-G) Glial network is marked with several cytoneme markers: (C) lifeact-GFP reporter  
1023 (green and glial nuclei are marked with Repo, magenta), (D) GMA-GFP (green), (E)  
1024 GPI-YFP (green), (F) GFP-MLC (green), (G) sqh-GFP (green) in a glioma brain. (H-I)  
1025 Downregulation of neuroglian (*nrg-RNAi*) in glioma brains results in defective TMs.

1026 (J-M) Higher magnifications of control brains (J) showing the glial cytonemes (red)  
1027 compared with the glioma brains where the TMs overgrow and enwrap neuronal  
1028 clusters (K). Upon *igl/Gap43* downregulation the glial network does not overgrow or  
1029 enwrap neuronal clusters (L) and shows a pattern and size similar to the control.  
1030 Nuclei are marked with DAPI. Arrows indicate glial cytonemes/TMs. (M) A viability  
1031 assay shows that the lethality induced by the glioma is fully rescued upon knockdown  
1032 of *Gap43/igl*. Nuclei are marked with DAPI. Scale bar size are indicated in this and all  
1033 figures. Genotypes: **Figure S1**

1034 (A) *w; lifeActin-GFP; repo-Gal4, UAS-ihog-RFP/UAS-lacZ*, (B-C) *UAS-dEGFR<sup>Δ</sup>, UAS-*  
1035 *dp110<sup>CAAX</sup>; lifeActin-GFP; repo-Gal4, UAS-ihog-RFP*, (D) *UAS-dEGFR<sup>Δ</sup>, UAS-*  
1036 *dp110<sup>CAAX</sup>; UAS-GMA-GFP; repo-Gal4, UAS-ihog-RFP*, (E) *UAS-dEGFR<sup>Δ</sup>, UAS-*  
1037 *dp110<sup>CAAX</sup>; UAS-GPI-YFP/Gal80<sup>ts</sup>; repo-Gal4, UAS-myrRFP*, (F) *UAS-dEGFR<sup>Δ</sup>, UAS-*  
1038 *dp110<sup>CAAX</sup>; Gal80<sup>ts</sup>; repo-Gal4, UAS-myrRFP/ UAS-GFP-sls(MLC)*, (G) *UAS-dEGFR<sup>Δ</sup>,*  
1039 *UAS-dp110<sup>CAAX</sup>; Gal80<sup>ts</sup>; repo-Gal4, UAS-myrRFP/ Sqh-GFP*, (H-I) *UAS-dEGFR<sup>Δ</sup>,*  
1040 *UAS-dp110<sup>CAAX</sup>; UAS-nrg-RNAi; repo-Gal4, UAS-ihog-RFP*, (J) *w; repo-Gal4, UAS-*  
1041 *ihog-RFP/UAS-lacZ*, (K) *UAS-dEGFR<sup>Δ</sup>, UAS-dp110<sup>CAAX</sup>::; repo-Gal4, UAS-ihog-RFP*,  
1042 (L) *UAS-dEGFR<sup>Δ</sup>, UAS-dp110<sup>CAAX</sup>::; repo-Gal4, UAS-ihog-RFP /UAS-igl-RNAi*

1043

1044 **Figure S2 (Related to Figure 1): *igl/Gap43* Knockdown does not show effects in**  
1045 **the number of synapses in the NMJ, in the glial network or in the viability of the**  
1046 **flies**

1047 (A-B) Glial cells are stained with Repo (green) and the number of glial cells are  
1048 quantified in the following genotypes: *Control*, *Glioma* showing an increase in Repo+  
1049 cells, *Glioma;lacZ* and *Glioma;yellow-RNAi* showing a similar number of Repo+ cells to  
1050 *Glioma* alone. (C-D) Upon *igl* knockdown by *RNAi* in normal brains, the glial network is  
1051 similar to the control. Glial cells are marked by Repo in green. Nuclei are marked by  
1052 DAPI. (E-F) Neurons from the larval neuromuscular junction are stained with Nc82  
1053 showing the synaptic active sites. Upon knockdown of *igl* the number of synapses  
1054 marked by Nc82 (green) is similar to the control. (F) Graph showing the quantification  
1055 of the synapse number. (G) A viability assay shows that the knockdown of *igl* does not  
1056 alter the % viability of male and female flies. Error bars show S.D. \*\*\* P<0.0001 or ns  
1057 for non-significant. Genotypes: (A) *UAS-dEGFR<sup>Δ</sup>*, *UAS-dp110<sup>CAAX</sup>*; *UAS-yellow-RNAi*;  
1058 *repo-Gal4*, *UAS-ihog-RFP*, (B) 1. *w*; *repo-Gal4*, *ihog-RFP/UAS-lacZ* 2. *UAS-dEGFR<sup>Δ</sup>*,  
1059 *UAS-dp110<sup>CAAX</sup>*; *repo-Gal4*, *UAS-ihog-RFP* 3. *UAS-dEGFR<sup>Δ</sup>*, *UAS-dp110<sup>CAAX</sup>*; *UAS-*  
1060 *lacZ*; *repo-Gal4*, *UAS-ihog-RFP* 4. *UAS-dEGFR<sup>Δ</sup>*, *UAS-dp110<sup>CAAX</sup>*; *UAS-yellow-RNAi*;  
1061 *repo-Gal4*, *UAS-ihog-RFP*, (C-D) *w*; *repo-Gal4*, *UAS-ihog-RFP/UAS-igl-RNAi*, (E-F) 1.  
1062 *w*; *UAS-CD8-GFP*; *D42-Gal4/UAS-igl-RNAi* 2. *w*; *UAS-CD8-GFP*; *D42-Gal4/UAS-lacZ*,  
1063 (G) 1. *w*; *repo-Gal4*, *UAS-ihog-RFP/UAS-lacZ* 2. *w*; *repo-Gal4*, *UAS-ihog-RFP/UAS-igl-*  
1064 *RNAi*

1065

1066 **Figure S3 (Related to Figure 2): Cases of human GB patients with mutations in**  
1067 **WNT or FZD.**

1068 Complete analysis of mutations in human GB samples from COSMIC database  
1069 <http://cancer.sanger.ac.uk/cosmic> (A) and Cancer Genome Atlas (TGAC) for  
1070 transcriptional targets of WNT pathway (B), WNT ligands (C) and FZD receptors (D),  
1071 data are represented in percentage out of 902 or 922 samples. The total number of

1072 cases with mutations in any WNT or FZD gene is shown in red. Genes from WNT and  
1073 FZD family without mutations in GBs is shown in the bottom.

1074

1075 **Figure S4 (Related to Figure 2): Fz2 remains normal in glioma brains.**

1076 (A) Wing imaginal control disc stained with Fz2 (green) showing the expected  
1077 endogenous localization pattern. Brains from 3rd instar larvae displayed at the same  
1078 scale. Glia is labeled with *UAS-Ihog-RFP* driven by *repo-Gal4* to visualize active  
1079 filopodia/TMs in glial cells, and stained with Fz2 (green). (B) Fz2 is homogeneously  
1080 distributed in control sections, (C) Fz2 is homogeneously distributed in glioma brain  
1081 sections, similar to the control. Nuclei are marked by DAPI (blue). Scale bar size is  
1082 indicated in the figure. Glial cell bodies and membranes are labeled with *UAS-myrRFP*  
1083 (red) driven by *repo-Gal4* and stained with GFP antibody to visualize a tagged form of  
1084 endogenous Fz1 protein. Genotypes: (A) *w; UAS-lacZ*, (B) *w;; repo-Gal4, ihog-*  
1085 *RFP/UAS-lacZ*, (C) *UAS-dEGFR<sup>Δ</sup>, UAS-dp110<sup>CAAX</sup>;; repo-Gal4, UAS-ihog-RFP*

1086

1087 **Figure S5 (Related to Figure 2 and 7): Validation of tools, RNAs and antibodies**

1088 (A) *UAS-Fz1-RNAi* tool was validated in epithelial tissue, wing imaginal discs. Upon  
1089 *UAS-Fz1-RNAi* expression in the posterior compartment (marked with GFP), there is a  
1090 reduction in Fz1 protein signal compared with the anterior compartment from the same  
1091 tissue. (B) *UAS-Wg-RNAi* tool was validated in epithelial tissue, wing imaginal discs.  
1092 Upon *UAS-Wg-RNAi* expression in the posterior compartment (marked with GFP),  
1093 there is a reduction in Wg protein signal compared with the anterior compartment from  
1094 the same tissue. (C) *lexAop-Fz1* tool was validated in brain tissue. Upon ectopic Fz1  
1095 expression in the neurons (driven by *ELAV-LexA* marked with GFP), there is an  
1096 increase in Fz1 protein signal compared with the rest of the brain tissue. (D) Upon

1097 ectopic Fz1 expression in the neurons (driven by *ELAV-LexA>lexAop-Fz1* marked with  
1098 GFP), there is an increase in active Arm protein signal compared with the rest of the  
1099 brain tissue.

1100 Genotypes: (A) *w; Gal80<sup>ts</sup>/UAS-Fz1-RNAi; en-Gal4, UAS-GFP*, (B) *w; Gal80<sup>ts</sup>/UAS-wg-*  
1101 *RNAi; en-Gal4, UAS-GFP*, (C-E) *w; lexAop-fz1/ elav-lexA, lexAop-CD8-GFP*  
1102

1103 **Figure S6 (Related to Figure 3): Wg and Fz1 transcription levels are similar**  
1104 **between controls and gliomas**

1105 (A) qPCRs with RNA extracted from control and glioma larvae showing no change in  
1106 the transcription (*mRNA* levels) of *wg* or *fz1*. (B) Western blot of samples extracted from  
1107 control and glioma larvae showing no change in the amount of Fz1 or Fz2 protein.  
1108 Error bars show S.D. ns for non-significant. (C) In situ hybridization experiments for Wg  
1109 and Fz1 in controls and gliomas showing no change in the transcription (*mRNA* levels)  
1110 of *wg* or *fz1*. Genotypes: (A-C) 1. *w;; repo-Gal4, ihog-RFP/UAS-lacZ* 2. *UAS-dEGFR<sup>Δ</sup>,*  
1111 *UAS-dp110<sup>CAAX</sup>;; repo-Gal4, UAS-ihog-RFP*

1112

1113 **Figure S7 (Related to Figure 4): Wg signaling pathway is active in glioma cells**

1114 Larval brain sections with glial network labeled in red and stained with Cyt-Arm (green).  
1115 (A) Knockdown of *Fz1* in glioma brains showing a homogeneous Cyt-Arm distribution  
1116 similar to the control. Quantification of Cyt-Arm staining ratio between *Ihog*<sup>+</sup> and *Ihog*<sup>-</sup>  
1117 domains is shown in principal Figure 5D. (B-G) Glial cell bodies and membranes are  
1118 labeled with myrRFP or *ihog*-RFP (red) driven by *repo-Gal4*. Wg signaling pathway  
1119 reporters *tsh-lacZ* stained with anti-bGal (B-C), *fz4-GFP* (D-E) and *dally-lacZ* stained  
1120 with anti-bGal (F-G) show activation of the pathway in glial transformed cells.  
1121 Genotypes: (A) *UAS-dEGFR<sup>Δ</sup>, UAS-dp110<sup>CAAX</sup>; UAS-Fz1-RNAi; repo-Gal4, UAS-ihog-*  
1122 *RFP*, (B) *w;; repo-Gal4, UAS-myrRFP/tsh-lacZ*, (C) *UAS-dEGFR<sup>Δ</sup>, UAS-dp110<sup>CAAX</sup>;;*

1123 *repo-Gal4, UAS-myrRFP/tsh-lacZ*, (D) *w*;; *repo-Gal4, UAS-myrRFP/ fz4-GFP*, (E) *UAS-*  
1124 *dEGFR<sup>Δ</sup>, UAS-dp110<sup>CAAX</sup>*;; *repo-Gal4, UAS-myrRFP/ fz4-GFP*, (F) *w*;; *repo-Gal4, UAS-*  
1125 *myrRFP/ dally-lacZ*, (G) *UAS-dEGFR<sup>Δ</sup>, UAS-dp110<sup>CAAX</sup>*;; *repo-Gal4, UAS-myrRFP/*  
1126 *dally-lacZ*

1127

1128 **Figure S8 (Related to Figure 4): Wg signaling pathway is active in human glioma**  
1129 **cells**

1130 (A-D) A series of grade II and III GB images from S24 xenografts brain sections stained  
1131 with WNT1 and  $\beta$ -Catenin show an increase of these signals in grade III when  
1132 compared with grade II brain sections, indicating that the accumulation of WNT1 and  $\beta$ -  
1133 Catenin correlates with the progression of the GB, quantified in (E-F) (G-H) Technical  
1134 immunohistofluorescence negative control in NMRI nude control mice brains stained  
1135 only with the corresponding secondary antibodies showing the background unspecific  
1136 signal. Nuclei are marked by DAPI (blue).

1137 **Figure S9 (Related to Figure 2, 4 and 6): Adult *Drosophila* gliomas**

1138 (A) Survival curve of adult control or glioma flies after a number of days of glioma  
1139 induction and progression. (B-H) Adult brain sections 7 days after glioma induction with  
1140 Glial cells are labeled with *UAS-myr-RFP* to visualize the glial network and stained with  
1141 Cyt-Arm, Fz1 and Wg antibodies. (B-C, D) Cyt-Arm staining specifically marks the  
1142 mushroom bodies and it is homogeneously distributed in the rest of the brain tissue in  
1143 control sections and accumulates in the neurons cytoplasm where it is inactive in  
1144 glioma brains. Quantification of Neuron/Glia Cyt-Arm staining ratio between RFP+ and  
1145 RFP<sup>-</sup> domains (D). (B'-C', E) Fz1 staining show homogeneous localization in the  
1146 control brains (B') in blue. In the glioma brains Fz1 accumulates in the glial  
1147 transformed cells (C'), Glia/Neuron Fz1 average pixel intensity ratio quantification is  
1148 shown in (E). (F-H) Wg is homogeneously distributed in control brains, with a slight

1149 accumulation in the RFP+ structures. Wg accumulates in the glioma network similar to  
1150 the larval brains. Glia/Neuron Wg average pixel intensity ratio quantification is shown in  
1151 (H). (I) Graph showing synapse number quantification of adult NMJs from control flies  
1152 and glioma-bearing flies. Error bars show S.D. \*\*\* P<0.0001 or ns for non-significant.  
1153 Genotypes: (B, F) *w*; *Gal80<sup>ts</sup>*; *repo-Gal4*, *UAS-myrRFP/UAS-lacZ*, (C, G) *UAS-dEGFR<sup>Δ</sup>*,  
1154 *UAS-dp110<sup>CAAX</sup>*; *Gal80<sup>ts</sup>*; *repo-Gal4*, *UAS-myrRFP*

1155

1156 **Figure S10 (Related to Figure 7): Restoration of the glia-neuron Wg/Fz1 signaling**  
1157 **equilibrium inhibits glioma progression**

1158 (A-D) Brains from 3rd instar larvae displayed at the same scale. Glia is labeled with  
1159 *UAS-Ihog-RFP* driven by *repo-Gal4* to visualize active filopodia in glial cells, and  
1160 stained with Wg or Cyt-Arm (green). Neurons are labeled with *lexAop-CD8-GFP* driven  
1161 by *elav-lexA* (blue). Fz1 overexpression in neurons (blue) restore homogeneous Wg  
1162 (grey or green in the merge) (B) and Cyt-Arm (D) protein distribution (green) in the  
1163 brain, compared to (A, C) where the *elav-lexA* is not present in the glioma brains,  
1164 Nuclei are marked by DAPI (blue) in (A, C). Genotypes: (A, C) *UAS-dEGFR<sup>Δ</sup>*, *UAS-*  
1165 *dp110<sup>CAAX</sup>*; *lexAop-Fz1*; *repo-Gal4*, *UAS-ihog-RFP*, (B, D) *UAS-dEGFR<sup>Δ</sup>*, *UAS-*  
1166 *dp110<sup>CAAX</sup>*; *lexAop-Fz1/ elav-lexA*, *lexAop-CD8-GFP*; *repo-Gal4*, *UAS-ihog-RFP*

1167

1168 **Video S1: Control Network**

1169 3D video reconstruction of control brains with glia labeled with *ihog-RFP* (*repo>ihog-*  
1170 *RFP*) in red (grey in the 3D reconstruction) to visualize cytoneme structures in glial  
1171 cells as part of an interconnecting network.

1172

1173 **Video S2: Glioma TMs**

1174 3D video reconstruction of Glioma brains with glia labeled with *ihog-RFP* (*repo>ihog-*  
1175 *RFP*) in red (grey in the 3D reconstruction) to visualize TMs structures in glial cells as  
1176 part of an interconnecting network. In glioma brains, the TMs expand across the brain  
1177 and form perineuronal nests.

1178

#### 1179 **Video S3: Glioma *igl-RNAi* Network**

1180 3D video reconstruction of Glioma; *igl-RNAi* brains with glia labeled with *ihog-RFP*  
1181 (*repo>ihog-RFP*) in red (grey in the 3D reconstruction) to visualize TM structures in  
1182 glial cells as part of an interconnecting network. Upon *igl* downregulation the glial  
1183 network does not overgrow or enwrap neuronal clusters and shows a pattern and size  
1184 similar to the control.

1185

#### 1186 **Video S4: Control LifeActin**

1187 3D video reconstruction of control brains from 3rd instar larvae. Glia is labeled with  
1188 *UAS-Ihog-RFP* driven by *repo-Gal4* to visualize cytonemes in glial cells as part of an  
1189 interconnecting network (red). Glial network is marked with lifeActin-GFP reporter  
1190 (green) and nuclei are marked with DAPI (blue).

1191

#### 1192 **Video S5: Glioma LifeActin**

1193 3D video reconstruction of gliomal brains from 3rd instar larvae. Glia is labeled with  
1194 *UAS-Ihog-RFP* driven by *repo-Gal4* to visualize TMs in glial cells as part of an  
1195 interconnecting network (red). Glial network is marked with lifeActin-GFP reporter  
1196 (green) and nuclei are marked with DAPI (blue). Glial TMs enwrap clusters of neurons  
1197 in individual GB perineuronal nests.

1198

1199 **Video S6: Climbing assay**

1200 Video of *Drosophila* adult negative geotaxis behavior analysis (climbing assay), as an  
1201 indication for possible motor defects associated with neurodegeneration. The results  
1202 showed symptoms of neurodegeneration in glioma flies (right tube) compared to  
1203 controls (left tube).

1204

1205

- 1206 1 Bi, W. L. & Beroukhim, R. Beating the odds: extreme long-term survival with  
1207 glioblastoma. *Neuro Oncol* **16**, 1159-1160, doi:nou166 [pii]  
1208 10.1093/neuonc/nou166 (2014).
- 1209 2 Messaoudi, K., Clavreul, A. & Lagarce, F. Toward an effective strategy in glioblastoma  
1210 treatment. Part I: resistance mechanisms and strategies to overcome resistance of  
1211 glioblastoma to temozolomide. *Drug Discov Today* **20**, 899-905, doi:S1359-  
1212 6446(15)00080-X [pii]  
1213 10.1016/j.drudis.2015.02.011 (2015).
- 1214 3 Belhadj, Z. *et al.* Multifunctional targeted liposomal drug delivery for efficient  
1215 glioblastoma treatment. *Oncotarget*, doi:17976 [pii]  
1216 10.18632/oncotarget.17976 (2017).
- 1217 4 Xu, Y. Y., Gao, P., Sun, Y. & Duan, Y. R. Development of targeted therapies in treatment  
1218 of glioblastoma. *Cancer Biol Med* **12**, 223-237, doi:10.7497/j.issn.2095-3941.2015.0020  
1219 cbm-12-03-223 [pii] (2015).
- 1220 5 Zhu, Y. *et al.* Bi-specific molecule against EGFR and death receptors simultaneously  
1221 targets proliferation and death pathways in tumors. *Sci Rep* **7**, 2602,  
1222 doi:10.1038/s41598-017-02483-9  
1223 10.1038/s41598-017-02483-9 [pii] (2017).
- 1224 6 Osuka, S. & Van Meir, E. G. Overcoming therapeutic resistance in glioblastoma: the  
1225 way forward. *J Clin Invest* **127**, 415-426, doi:89587 [pii]  
1226 10.1172/JCI89587 (2017).
- 1227 7 Shtutman, M. *et al.* The cyclin D1 gene is a target of the beta-catenin/LEF-1 pathway.  
1228 *Proc Natl Acad Sci U S A* **96**, 5522-5527 (1999).
- 1229 8 He, T. C. *et al.* Identification of c-MYC as a target of the APC pathway. *Science* **281**,  
1230 1509-1512 (1998).
- 1231 9 Loh, K. M., van Amerongen, R. & Nusse, R. Generating Cellular Diversity and Spatial  
1232 Form: Wnt Signaling and the Evolution of Multicellular Animals. *Dev Cell* **38**, 643-655,  
1233 doi:10.1016/j.devcel.2016.08.011 (2016).
- 1234 10 Oliva, C. A., Vargas, J. Y. & Inestrosa, N. C. Wnts in adult brain: from synaptic plasticity  
1235 to cognitive deficiencies. *Front Cell Neurosci* **7**, 224, doi:10.3389/fncel.2013.00224  
1236 (2013).
- 1237 11 Inestrosa, N. C. & Varela-Nallar, L. Wnt signaling in the nervous system and in  
1238 Alzheimer's disease. *J Mol Cell Biol* **6**, 64-74, doi:10.1093/jmcb/mjt051 (2014).



- 1239 12 Arnes, M. & Casas Tinto, S. Aberrant Wnt signaling: a special focus in CNS diseases. *J*  
1240 *Neurogenet*, 1-7, doi:10.1080/01677063.2017.1338696 (2017).
- 1241 13 Paul, I., Bhattacharya, S., Chatterjee, A. & Ghosh, M. K. Current Understanding on  
1242 EGFR and Wnt/beta-Catenin Signaling in Glioma and Their Possible Crosstalk. *Genes*  
1243 *Cancer* **4**, 427-446, doi:10.1177/1947601913503341  
1244 10.1177\_1947601913503341 [pii] (2013).
- 1245 14 Qiu, X., Jiao, J., Li, Y. & Tian, T. Overexpression of FZD7 promotes glioma cell  
1246 proliferation by upregulating TAZ. *Oncotarget* **7**, 85987-85999, doi:13292 [pii]  
1247 10.18632/oncotarget.13292 (2016).
- 1248 15 Suwala, A. K., Hanaford, A., Kahlert, U. D. & Maciaczyk, J. Clipping the Wings of  
1249 Glioblastoma: Modulation of WNT as a Novel Therapeutic Strategy. *J Neuropathol Exp*  
1250 *Neurol* **75**, 388-396, doi:nlw013 [pii]  
1251 10.1093/jnen/nlw013 (2016).
- 1252 16 Liu, C. *et al.* Wnt/beta-Catenin pathway in human glioma: expression pattern and  
1253 clinical/prognostic correlations. *Clin Exp Med* **11**, 105-112, doi:10.1007/s10238-010-  
1254 0110-9 (2011).
- 1255 17 Sareddy, G. R., Panigrahi, M., Challa, S., Mahadevan, A. & Babu, P. P. Activation of  
1256 Wnt/beta-catenin/Tcf signaling pathway in human astrocytomas. *Neurochem Int* **55**,  
1257 307-317, doi:S0197-0186(09)00123-5 [pii]  
1258 10.1016/j.neuint.2009.03.016 (2009).
- 1259 18 Rheinbay, E. *et al.* An aberrant transcription factor network essential for Wnt signaling  
1260 and stem cell maintenance in glioblastoma. *Cell Rep* **3**, 1567-1579, doi:S2211-  
1261 1247(13)00203-9 [pii]  
1262 10.1016/j.celrep.2013.04.021 (2013).
- 1263 19 Osswald, M. *et al.* Brain tumour cells interconnect to a functional and resistant  
1264 network. *Nature* **528**, 93-98, doi:nature16071 [pii]  
1265 10.1038/nature16071 (2015).
- 1266 20 Weil, S. *et al.* Tumor microtubules convey resistance to surgical lesions and  
1267 chemotherapy in gliomas. *Neuro Oncol* **19**, 1316-1326, doi:3738031 [pii]  
1268 10.1093/neuonc/nox070 (2017).
- 1269 21 Lou, E. *et al.* Imaging Tunneling Membrane Tubes Elucidates Cell Communication in  
1270 Tumors. *Trends Cancer* **3**, 678-685, doi:S2405-8033(17)30158-9 [pii]  
1271 10.1016/j.trecan.2017.08.001 (2017).
- 1272 22 Ramirez-Weber, F. A. & Kornberg, T. B. Cytonemes: cellular processes that project to  
1273 the principal signaling center in Drosophila imaginal discs. *Cell* **97**, 599-607, doi:S0092-  
1274 8674(00)80771-0 [pii] (1999).
- 1275 23 Kornberg, T. B. Distributing signaling proteins in space and time: the province of  
1276 cytonemes. *Curr Opin Genet Dev* **45**, 22-27, doi:S0959-437X(16)30219-2 [pii]  
1277 10.1016/j.gde.2017.02.010 (2017).
- 1278 24 Read, R. D., Cavenee, W. K., Furnari, F. B. & Thomas, J. B. A drosophila model for EGFR-  
1279 Ras and PI3K-dependent human glioma. *PLoS Genet* **5**, e1000374,  
1280 doi:10.1371/journal.pgen.1000374 (2009).
- 1281 25 Read, R. D. *et al.* A kinome-wide RNAi screen in Drosophila Glia reveals that the RIO  
1282 kinases mediate cell proliferation and survival through TORC2-Akt signaling in  
1283 glioblastoma. *PLoS Genet* **9**, e1003253, doi:10.1371/journal.pgen.1003253  
1284 PGENETICS-D-12-01408 [pii] (2013).
- 1285 26 Yao, S., Lum, L. & Beachy, P. The ihog cell-surface proteins bind Hedgehog and mediate  
1286 pathway activation. *Cell* **125**, 343-357, doi:10.1016/j.cell.2006.02.040 (2006).
- 1287 27 Callejo, A. *et al.* Dispatched mediates Hedgehog basolateral release to form the long-  
1288 range morphogenetic gradient in the Drosophila wing disk epithelium. *Proc Natl Acad*  
1289 *Sci U S A* **108**, 12591-12598, doi:1106881108 [pii]  
1290 10.1073/pnas.1106881108 (2011).

- 1291 28 Bischoff, M. *et al.* Cytonemes are required for the establishment of a normal  
1292 Hedgehog morphogen gradient in *Drosophila* epithelia. *Nat Cell Biol* **15**, 1269-1281,  
1293 doi:10.1038/ncb2856 (2013).
- 1294 29 Holland, E. C. Glioblastoma multiforme: the terminator. *Proc Natl Acad Sci U S A* **97**,  
1295 6242-6244, doi:97/12/6242 [pii] (2000).
- 1296 30 Roy, S., Huang, H., Liu, S. & Kornberg, T. B. Cytoneme-mediated contact-dependent  
1297 transport of the *Drosophila* decapentaplegic signaling protein. *Science* **343**, 1244624,  
1298 doi:science.1244624 [pii]  
1299 10.1126/science.1244624 (2014).
- 1300 31 Neel, V. A. & Young, M. W. Igloo, a GAP-43-related gene expressed in the developing  
1301 nervous system of *Drosophila*. *Development* **120**, 2235-2243 (1994).
- 1302 32 Campos, B., Olsen, L. R., Urup, T. & Poulsen, H. S. A comprehensive profile of recurrent  
1303 glioblastoma. *Oncogene* **35**, 5819-5825, doi:onc201685 [pii]  
1304 10.1038/onc.2016.85 (2016).
- 1305 33 Venkatesan, S., Lamfers, M. L., Dirven, C. M. & Leenstra, S. Genetic biomarkers of drug  
1306 response for small-molecule therapeutics targeting the RTK/Ras/PI3K, p53 or Rb  
1307 pathway in glioblastoma. *CNS Oncol* **5**, 77-90, doi:10.2217/cns-2015-0005 (2016).
- 1308 34 Kahlert, U. D. *et al.* Pharmacologic Wnt Inhibition Reduces Proliferation, Survival, and  
1309 Clonogenicity of Glioblastoma Cells. *J Neuropathol Exp Neurol* **74**, 889-900,  
1310 doi:10.1097/NEN.0000000000000227 (2015).
- 1311 35 Paw, I., Carpenter, R. C., Watabe, K., Debinski, W. & Lo, H. W. Mechanisms regulating  
1312 glioma invasion. *Cancer Lett* **362**, 1-7, doi:S0304-3835(15)00195-0 [pii]  
1313 10.1016/j.canlet.2015.03.015 (2015).
- 1314 36 Zheng, H. *et al.* PLAGL2 regulates Wnt signaling to impede differentiation in neural  
1315 stem cells and gliomas. *Cancer Cell* **17**, 497-509, doi:S1535-6108(10)00147-9 [pii]  
1316 10.1016/j.ccr.2010.03.020 (2010).
- 1317 37 Kim, Y. *et al.* Wnt activation is implicated in glioblastoma radioresistance. *Lab Invest*  
1318 **92**, 466-473, doi:labinvest2011161 [pii]  
1319 10.1038/labinvest.2011.161 (2012).
- 1320 38 Kamino, M. *et al.* Wnt-5a signaling is correlated with infiltrative activity in human  
1321 glioma by inducing cellular migration and MMP-2. *Cancer Sci* **102**, 540-548,  
1322 doi:10.1111/j.1349-7006.2010.01815.x (2011).
- 1323 39 Pu, P. *et al.* Downregulation of Wnt2 and beta-catenin by siRNA suppresses malignant  
1324 glioma cell growth. *Cancer Gene Ther* **16**, 351-361, doi:cgt200878 [pii]  
1325 10.1038/cgt.2008.78 (2009).
- 1326 40 Lee, Y., Lee, J. K., Ahn, S. H., Lee, J. & Nam, D. H. WNT signaling in glioblastoma and  
1327 therapeutic opportunities. *Lab Invest* **96**, 137-150, doi:labinvest2015140 [pii]  
1328 10.1038/labinvest.2015.140 (2016).
- 1329 41 Jin, X. *et al.* Frizzled 4 regulates stemness and invasiveness of migrating glioma cells  
1330 established by serial intracranial transplantation. *Cancer Res* **71**, 3066-3075, doi:0008-  
1331 5472.CAN-10-1495 [pii]  
1332 10.1158/0008-5472.CAN-10-1495 (2011).
- 1333 42 Lee, Y. *et al.* FoxM1 Promotes Stemness and Radio-Resistance of Glioblastoma by  
1334 Regulating the Master Stem Cell Regulator Sox2. *PLoS One* **10**, e0137703,  
1335 doi:10.1371/journal.pone.0137703  
1336 PONE-D-15-20790 [pii] (2015).
- 1337 43 Nager, M. *et al.* beta-Catenin Signalling in Glioblastoma Multiforme and Glioma-  
1338 Initiating Cells. *Chemother Res Pract* **2012**, 192362, doi:10.1155/2012/192362 (2012).
- 1339 44 Wang, Z., Zhang, S., Siu, T. L. & Huang, S. Glioblastoma multiforme formation and EMT:  
1340 role of FoxM1 transcription factor. *Curr Pharm Des* **21**, 1268-1271, doi:CPD-EPUB-  
1341 63931 [pii] (2015).

- 1342 45 Zhang, N. *et al.* FoxM1 promotes beta-catenin nuclear localization and controls Wnt  
1343 target-gene expression and glioma tumorigenesis. *Cancer Cell* **20**, 427-442, doi:S1535-  
1344 6108(11)00312-6 [pii]  
1345 10.1016/j.ccr.2011.08.016 (2011).
- 1346 46 Denysenko, T. *et al.* WNT/beta-catenin Signaling Pathway and Downstream  
1347 Modulators in Low- and High-grade Glioma. *Cancer Genomics Proteomics* **13**, 31-45,  
1348 doi:13/1/31 [pii] (2016).
- 1349 47 Schilling, S., Steiner, S., Zimmerli, D. & Basler, K. A regulatory receptor network directs  
1350 the range and output of the Wingless signal. *Development* **141**, 2483-2493,  
1351 doi:10.1242/dev.108662 (2014).
- 1352 48 Feinberg, E. H. *et al.* GFP Reconstitution Across Synaptic Partners (GRASP) defines cell  
1353 contacts and synapses in living nervous systems. *Neuron* **57**, 353-363, doi:S0896-  
1354 6273(07)01020-3 [pii]  
1355 10.1016/j.neuron.2007.11.030 (2008).
- 1356 49 Soderberg, O. *et al.* Direct observation of individual endogenous protein complexes in  
1357 situ by proximity ligation. *Nat Methods* **3**, 995-1000, doi:nmeth947 [pii]  
1358 10.1038/nmeth947 (2006).
- 1359 50 Koos, B. *et al.* Analysis of protein interactions in situ by proximity ligation assays. *Curr*  
1360 *Top Microbiol Immunol* **377**, 111-126, doi:10.1007/82\_2013\_334 (2014).
- 1361 51 Klaus, A. & Birchmeier, W. Wnt signalling and its impact on development and cancer.  
1362 *Nat Rev Cancer* **8**, 387-398, doi:nrc2389 [pii]  
1363 10.1038/nrc2389 (2008).
- 1364 52 Riggelman, B., Schedl, P. & Wieschaus, E. Spatial expression of the *Drosophila* segment  
1365 polarity gene armadillo is posttranscriptionally regulated by wingless. *Cell* **63**, 549-560,  
1366 doi:0092-8674(90)90451-J [pii] (1990).
- 1367 53 Singh, A., Kango-Singh, M. & Sun, Y. H. Eye suppression, a novel function of teashirt,  
1368 requires Wingless signaling. *Development* **129**, 4271-4280 (2002).
- 1369 54 DasGupta, R., Kaykas, A., Moon, R. T. & Perrimon, N. Functional genomic analysis of  
1370 the Wnt-wingless signaling pathway. *Science* **308**, 826-833,  
1371 doi:10.1126/science.1109374 (2005).
- 1372 55 Franz, A., Shlyueva, D., Brunner, E., Stark, A. & Basler, K. Probing the canonicity of the  
1373 Wnt/Wingless signaling pathway. *PLoS Genet* **13**, e1006700,  
1374 doi:10.1371/journal.pgen.1006700  
1375 PGENETICS-D-17-00130 [pii] (2017).
- 1376 56 Scherer, H. J. A Critical Review: The Pathology of Cerebral Gliomas. *J Neurol Psychiatry*  
1377 **3**, 147-177 (1940).
- 1378 57 Peng, F. *et al.* Loss of Polo ameliorates APP-induced Alzheimer's disease-like symptoms  
1379 in *Drosophila*. *Sci Rep* **5**, 16816, doi:srep16816 [pii]  
1380 10.1038/srep16816 (2015).
- 1381 58 Keshishian, H., Broadie, K., Chiba, A. & Bate, M. The *drosophila* neuromuscular  
1382 junction: a model system for studying synaptic development and function. *Annu Rev*  
1383 *Neurosci* **19**, 545-575, doi:10.1146/annurev.ne.19.030196.002553 (1996).
- 1384 59 Mhatre, S. D. *et al.* Synaptic abnormalities in a *Drosophila* model of Alzheimer's  
1385 disease. *Dis Model Mech* **7**, 373-385, doi:dmm.012104 [pii]  
1386 10.1242/dmm.012104 (2014).
- 1387 60 Penney, J. *et al.* LRRK2 regulates retrograde synaptic compensation at the *Drosophila*  
1388 neuromuscular junction. *Nat Commun* **7**, 12188, doi:ncomms12188 [pii]  
1389 10.1038/ncomms12188 (2016).
- 1390 61 Boyle, M., Bonini, N. & DiNardo, S. Expression and function of *clift* in the development  
1391 of somatic gonadal precursors within the *Drosophila* mesoderm. *Development* **124**,  
1392 971-982 (1997).

- 1393 62 Arrazola, M. S., Silva-Alvarez, C. & Inestrosa, N. C. How the Wnt signaling pathway  
1394 protects from neurodegeneration: the mitochondrial scenario. *Front Cell Neurosci* **9**,  
1395 166, doi:10.3389/fncel.2015.00166 (2015).
- 1396 63 Garcia-Velazquez, L. & Arias, C. The emerging role of Wnt signaling dysregulation in the  
1397 understanding and modification of age-associated diseases. *Ageing Res Rev* **37**, 135-  
1398 145, doi:S1568-1637(17)30090-9 [pii]  
1399 10.1016/j.arr.2017.06.001 (2017).
- 1400 64 Kahn, M. Can we safely target the WNT pathway? *Nat Rev Drug Discov* **13**, 513-532,  
1401 doi:nrd4233 [pii]  
1402 10.1038/nrd4233 (2014).
- 1403 65 Libro, R., Bramanti, P. & Mazzon, E. The role of the Wnt canonical signaling in  
1404 neurodegenerative diseases. *Life Sci* **158**, 78-88, doi:S0024-3205(16)30380-0 [pii]  
1405 10.1016/j.lfs.2016.06.024 (2016).
- 1406 66 Casas-Tinto, S., Arnes, M. & Ferrus, A. Drosophila enhancer-Gal4 lines show ectopic  
1407 expression during development. *R Soc Open Sci* **4**, 170039, doi:10.1098/rsos.170039  
1408 rsos170039 [pii] (2017).
- 1409 67 Lai, S. L. & Lee, T. Genetic mosaic with dual binary transcriptional systems in  
1410 Drosophila. *Nat Neurosci* **9**, 703-709, doi:10.1038/nn1681 (2006).
- 1411 68 Bejsovec, A. & Martinez Arias, A. Roles of wingless in patterning the larval epidermis of  
1412 Drosophila. *Development* **113**, 471-485 (1991).
- 1413 69 Alexandre, C., Baena-Lopez, A. & Vincent, J. P. Patterning and growth control by  
1414 membrane-tethered Wingless. *Nature* **505**, 180-185, doi:10.1038/nature12879 (2014).
- 1415 70 Zecca, M., Basler, K. & Struhl, G. Direct and long-range action of a wingless morphogen  
1416 gradient. *Cell* **87**, 833-844 (1996).
- 1417 71 Venkatesh, H. S. *et al.* Neuronal Activity Promotes Glioma Growth through Neuroigin-  
1418 3 Secretion. *Cell* **161**, 803-816, doi:S0092-8674(15)00429-8 [pii]  
1419 10.1016/j.cell.2015.04.012 (2015).
- 1420 72 Johung, T. & Monje, M. Neuronal activity in the glioma microenvironment. *Curr Opin*  
1421 *Neurobiol* **47**, 156-161, doi:S0959-4388(17)30058-2 [pii]  
1422 10.1016/j.conb.2017.10.009 (2017).
- 1423 73 Qin, E. Y. *et al.* Neural Precursor-Derived Pleiotrophin Mediates Subventricular Zone  
1424 Invasion by Glioma. *Cell* **170**, 845-859 e819, doi:S0092-8674(17)30823-1 [pii]  
1425 10.1016/j.cell.2017.07.016 (2017).
- 1426 74 Jung, E. *et al.* Tweety-Homolog 1 Drives Brain Colonization of Gliomas. *J Neurosci* **37**,  
1427 6837-6850, doi:JNEUROSCI.3532-16.2017 [pii]  
1428 10.1523/JNEUROSCI.3532-16.2017 (2017).
- 1429 75 Bergo, E. *et al.* Cognitive Rehabilitation in Patients with Gliomas and Other Brain  
1430 Tumors: State of the Art. *Biomed Res Int* **2016**, 3041824, doi:10.1155/2016/3041824  
1431 (2016).
- 1432 76 Bosma, I. *et al.* The course of neurocognitive functioning in high-grade glioma patients.  
1433 *Neuro Oncol* **9**, 53-62, doi:10.1215/15228517-2006-012 (2007).
- 1434 77 Brown, P. D. *et al.* Detrimental effects of tumor progression on cognitive function of  
1435 patients with high-grade glioma. *J Clin Oncol* **24**, 5427-5433,  
1436 doi:10.1200/JCO.2006.08.5605 (2006).
- 1437 78 Wefel, J. S. *et al.* Neurocognitive function in patients with recurrent glioblastoma  
1438 treated with bevacizumab. *Neuro Oncol* **13**, 660-668, doi:10.1093/neuonc/nor024  
1439 (2011).
- 1440 79 Gehrke, A. K., Baisley, M. C., Sonck, A. L., Wronski, S. L. & Feuerstein, M.  
1441 Neurocognitive deficits following primary brain tumor treatment: systematic review of  
1442 a decade of comparative studies. *J Neurooncol* **115**, 135-142, doi:10.1007/s11060-013-  
1443 1215-2 (2013).

- 1444 80 Henstridge, C. M., Pickett, E. & Spires-Jones, T. L. Synaptic pathology: A shared  
1445 mechanism in neurological disease. *Ageing Res Rev* **28**, 72-84,  
1446 doi:10.1016/j.arr.2016.04.005 (2016).
- 1447 81 Hong, S. *et al.* Complement and microglia mediate early synapse loss in Alzheimer  
1448 mouse models. *Science* **352**, 712-716, doi:10.1126/science.aad8373 (2016).
- 1449 82 Sephton, C. F. & Yu, G. The function of RNA-binding proteins at the synapse:  
1450 implications for neurodegeneration. *Cell Mol Life Sci* **72**, 3621-3635,  
1451 doi:10.1007/s00018-015-1943-x (2015).
- 1452 83 Mansilla, A. *et al.* Interference of the complex between NCS-1 and Ric8a with  
1453 phenothiazines regulates synaptic function and is an approach for fragile X syndrome.  
1454 *Proc Natl Acad Sci U S A* **114**, E999-E1008, doi:10.1073/pnas.1611089114 (2017).
- 1455 84 Romero-Pozuelo, J. *et al.* The guanine-exchange factor Ric8a binds to the Ca<sup>2+</sup>(+)  
1456 sensor NCS-1 to regulate synapse number and neurotransmitter release. *J Cell Sci* **127**,  
1457 4246-4259, doi:10.1242/jcs.152603 (2014).
- 1458 85 John Lin, C. C. *et al.* Identification of diverse astrocyte populations and their malignant  
1459 analogs. *Nat Neurosci* **20**, 396-405, doi:10.1038/nn.4493 (2017).
- 1460 86 Salter, M. W. & Stevens, B. Microglia emerge as central players in brain disease. *Nat*  
1461 *Med* **23**, 1018-1027, doi:nm.4397 [pii]  
1462 10.1038/nm.4397 (2017).
- 1463 87 Niikura, T., Tajima, H. & Kita, Y. Neuronal cell death in Alzheimer's disease and a  
1464 neuroprotective factor, humanin. *Curr Neuropharmacol* **4**, 139-147 (2006).
- 1465 88 Ye, Z. C., Rothstein, J. D. & Sontheimer, H. Compromised glutamate transport in human  
1466 glioma cells: reduction-mislocalization of sodium-dependent glutamate transporters  
1467 and enhanced activity of cystine-glutamate exchange. *J Neurosci* **19**, 10767-10777  
1468 (1999).
- 1469 89 Lee, S. G. *et al.* Oncogene AEG-1 promotes glioma-induced neurodegeneration by  
1470 increasing glutamate excitotoxicity. *Cancer Res* **71**, 6514-6523, doi:0008-5472.CAN-11-  
1471 0782 [pii]  
1472 10.1158/0008-5472.CAN-11-0782 (2011).
- 1473 90 Robert, S. M. *et al.* SLC7A11 expression is associated with seizures and predicts poor  
1474 survival in patients with malignant glioma. *Sci Transl Med* **7**, 289ra286,  
1475 doi:7/289/289ra86 [pii]  
1476 10.1126/scitranslmed.aaa8103 (2015).
- 1477 91 Kornberg, T. B. Cytonemes extend their reach. *EMBO J* **32**, 1658-1659,  
1478 doi:emboj2013115 [pii]  
1479 10.1038/emboj.2013.115 (2013).
- 1480 92 Kornberg, T. B. & Roy, S. Cytonemes as specialized signaling filopodia. *Development*  
1481 **141**, 729-736, doi:141/4/729 [pii]  
1482 10.1242/dev.086223 (2014).
- 1483 93 Sherer, N. M. & Mothes, W. Cytonemes and tunneling nanotubules in cell-cell  
1484 communication and viral pathogenesis. *Trends Cell Biol* **18**, 414-420, doi:S0962-  
1485 8924(08)00190-6 [pii]  
1486 10.1016/j.tcb.2008.07.003 (2008).
- 1487 94 Neumann-Giesen, C. *et al.* Membrane and raft association of reggie-1/flotillin-2: role of  
1488 myristoylation, palmitoylation and oligomerization and induction of filopodia by  
1489 overexpression. *Biochem J* **378**, 509-518, doi:10.1042/BJ20031100 (2004).
- 1490 95 Watts, R. J., Schuldiner, O., Perrino, J., Larsen, C. & Luo, L. Glia engulf degenerating  
1491 axons during developmental axon pruning. *Curr Biol* **14**, 678-684,  
1492 doi:10.1016/j.cub.2004.03.035  
1493 S0960-9822(04)00214-3 [pii] (2004).

- 1494 96 Greco, V., Hannus, M. & Eaton, S. Argosomes: a potential vehicle for the spread of  
1495 morphogens through epithelia. *Cell* **106**, 633-645, doi:S0092-8674(01)00484-6 [pii]  
1496 (2001).
- 1497 97 Bloor, J. W. & Kiehart, D. P. zipper Nonmuscle myosin-II functions downstream of PS2  
1498 integrin in Drosophila myogenesis and is necessary for myofibril formation. *Dev Biol*  
1499 **239**, 215-228, doi:10.1006/dbio.2001.0452  
1500 S0012-1606(01)90452-X [pii] (2001).
- 1501 98 Furnari, F. B. *et al.* Malignant astrocytic glioma: genetics, biology, and paths to  
1502 treatment. *Genes Dev* **21**, 2683-2710, doi:21/21/2683 [pii]  
1503 10.1101/gad.1596707 (2007).
- 1504 99 Maher, E. A. *et al.* Malignant glioma: genetics and biology of a grave matter. *Genes Dev*  
1505 **15**, 1311-1333, doi:10.1101/gad.891601 (2001).
- 1506 100 Kegelman, T. P. *et al.* In vivo modeling of malignant glioma: the road to effective  
1507 therapy. *Adv Cancer Res* **121**, 261-330, doi:B978-0-12-800249-0.00007-X [pii]  
1508 10.1016/B978-0-12-800249-0.00007-X (2014).
- 1509 101 Read, R. D. Drosophila melanogaster as a model system for human brain cancers. *Glia*  
1510 **59**, 1364-1376, doi:10.1002/glia.21148 (2011).
- 1511 102 Brand, A. H. & Perrimon, N. Targeted gene expression as a means of altering cell fates  
1512 and generating dominant phenotypes. *Development* **118**, 401-415 (1993).
- 1513 103 Bastock, R. & Strutt, D. The planar polarity pathway promotes coordinated cell  
1514 migration during Drosophila oogenesis. *Development* **134**, 3055-3064,  
1515 doi:10.1242/dev.010447 (2007).
- 1516 104 Martin, M., Ostale, C. M. & de Celis, J. F. Patterning of the Drosophila L2 vein is driven  
1517 by regulatory interactions between region-specific transcription factors expressed in  
1518 response to Dpp signalling. *Development* **144**, 3168-3176, doi:dev.143461 [pii]  
1519 10.1242/dev.143461 (2017).
- 1520 105 Martin-Pena, A. *et al.* Cell types and coincident synapses in the ellipsoid body of  
1521 Drosophila. *Eur J Neurosci* **39**, 1586-1601, doi:10.1111/ejn.12537 (2014).
- 1522
- 1523

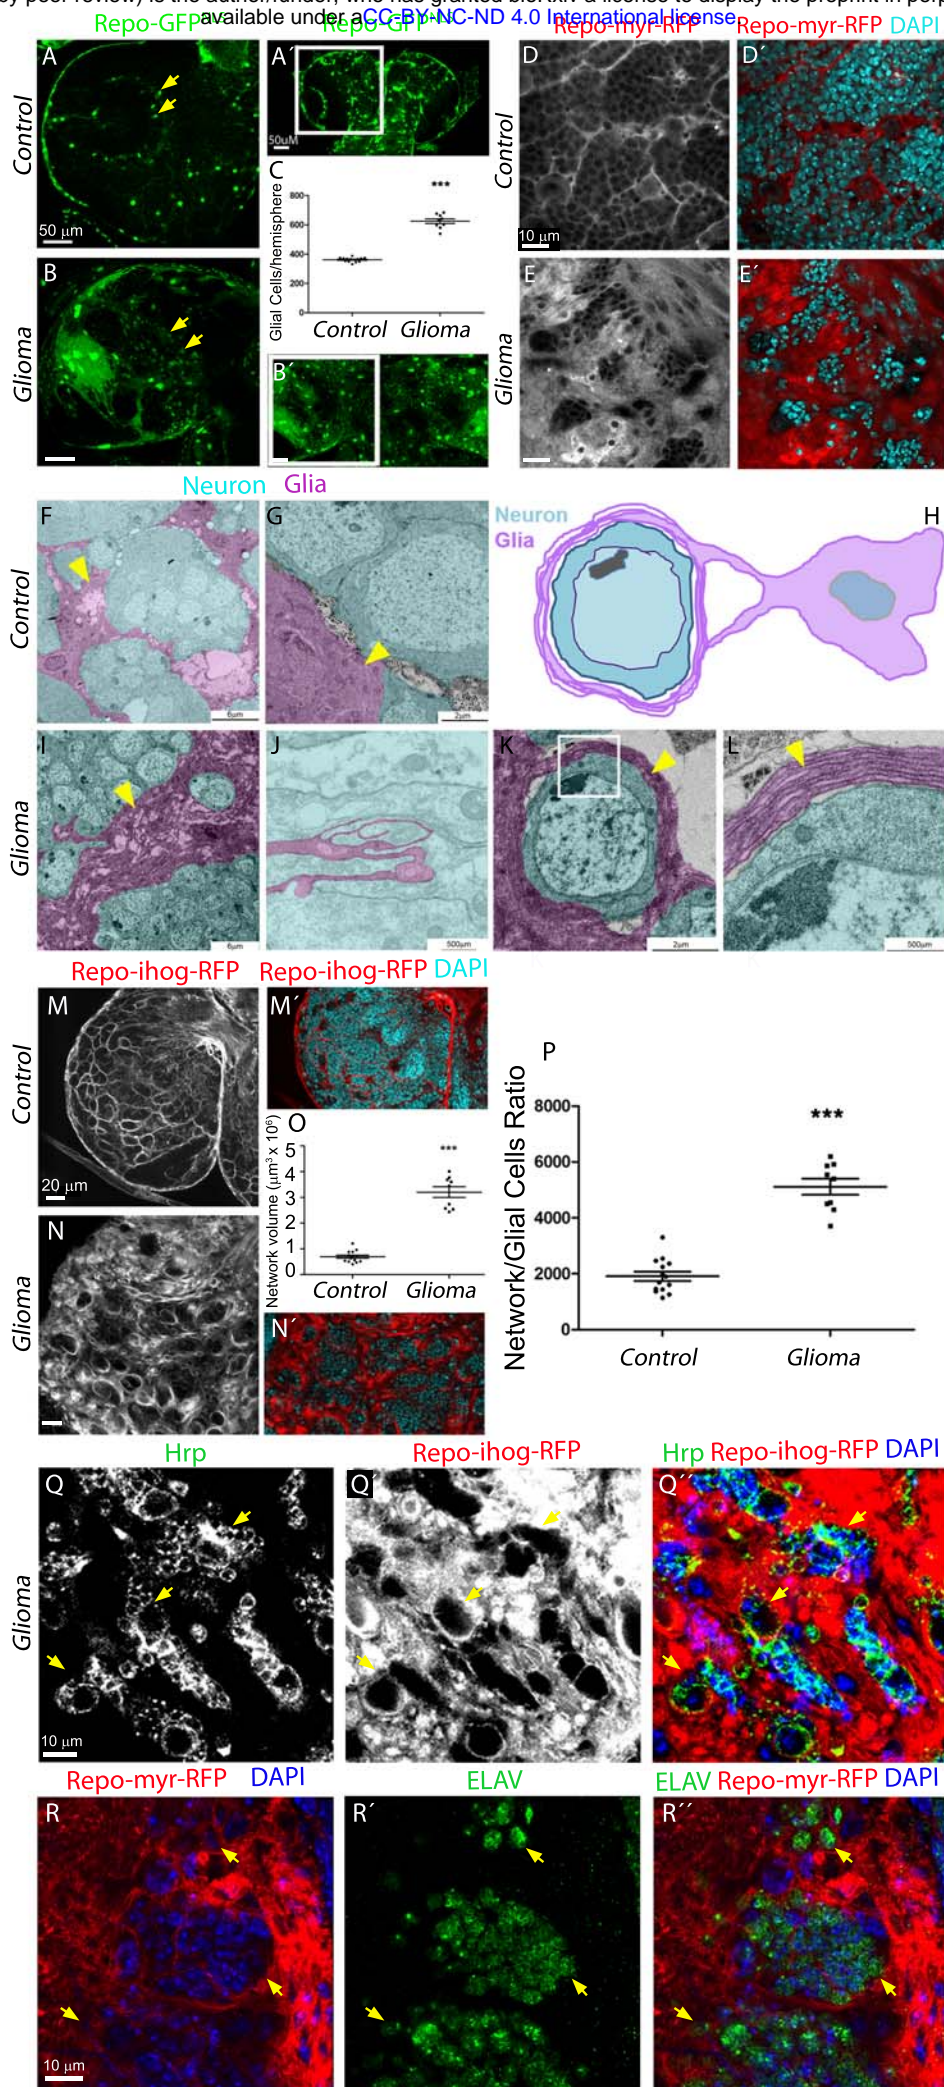

## Portela\_Fig2

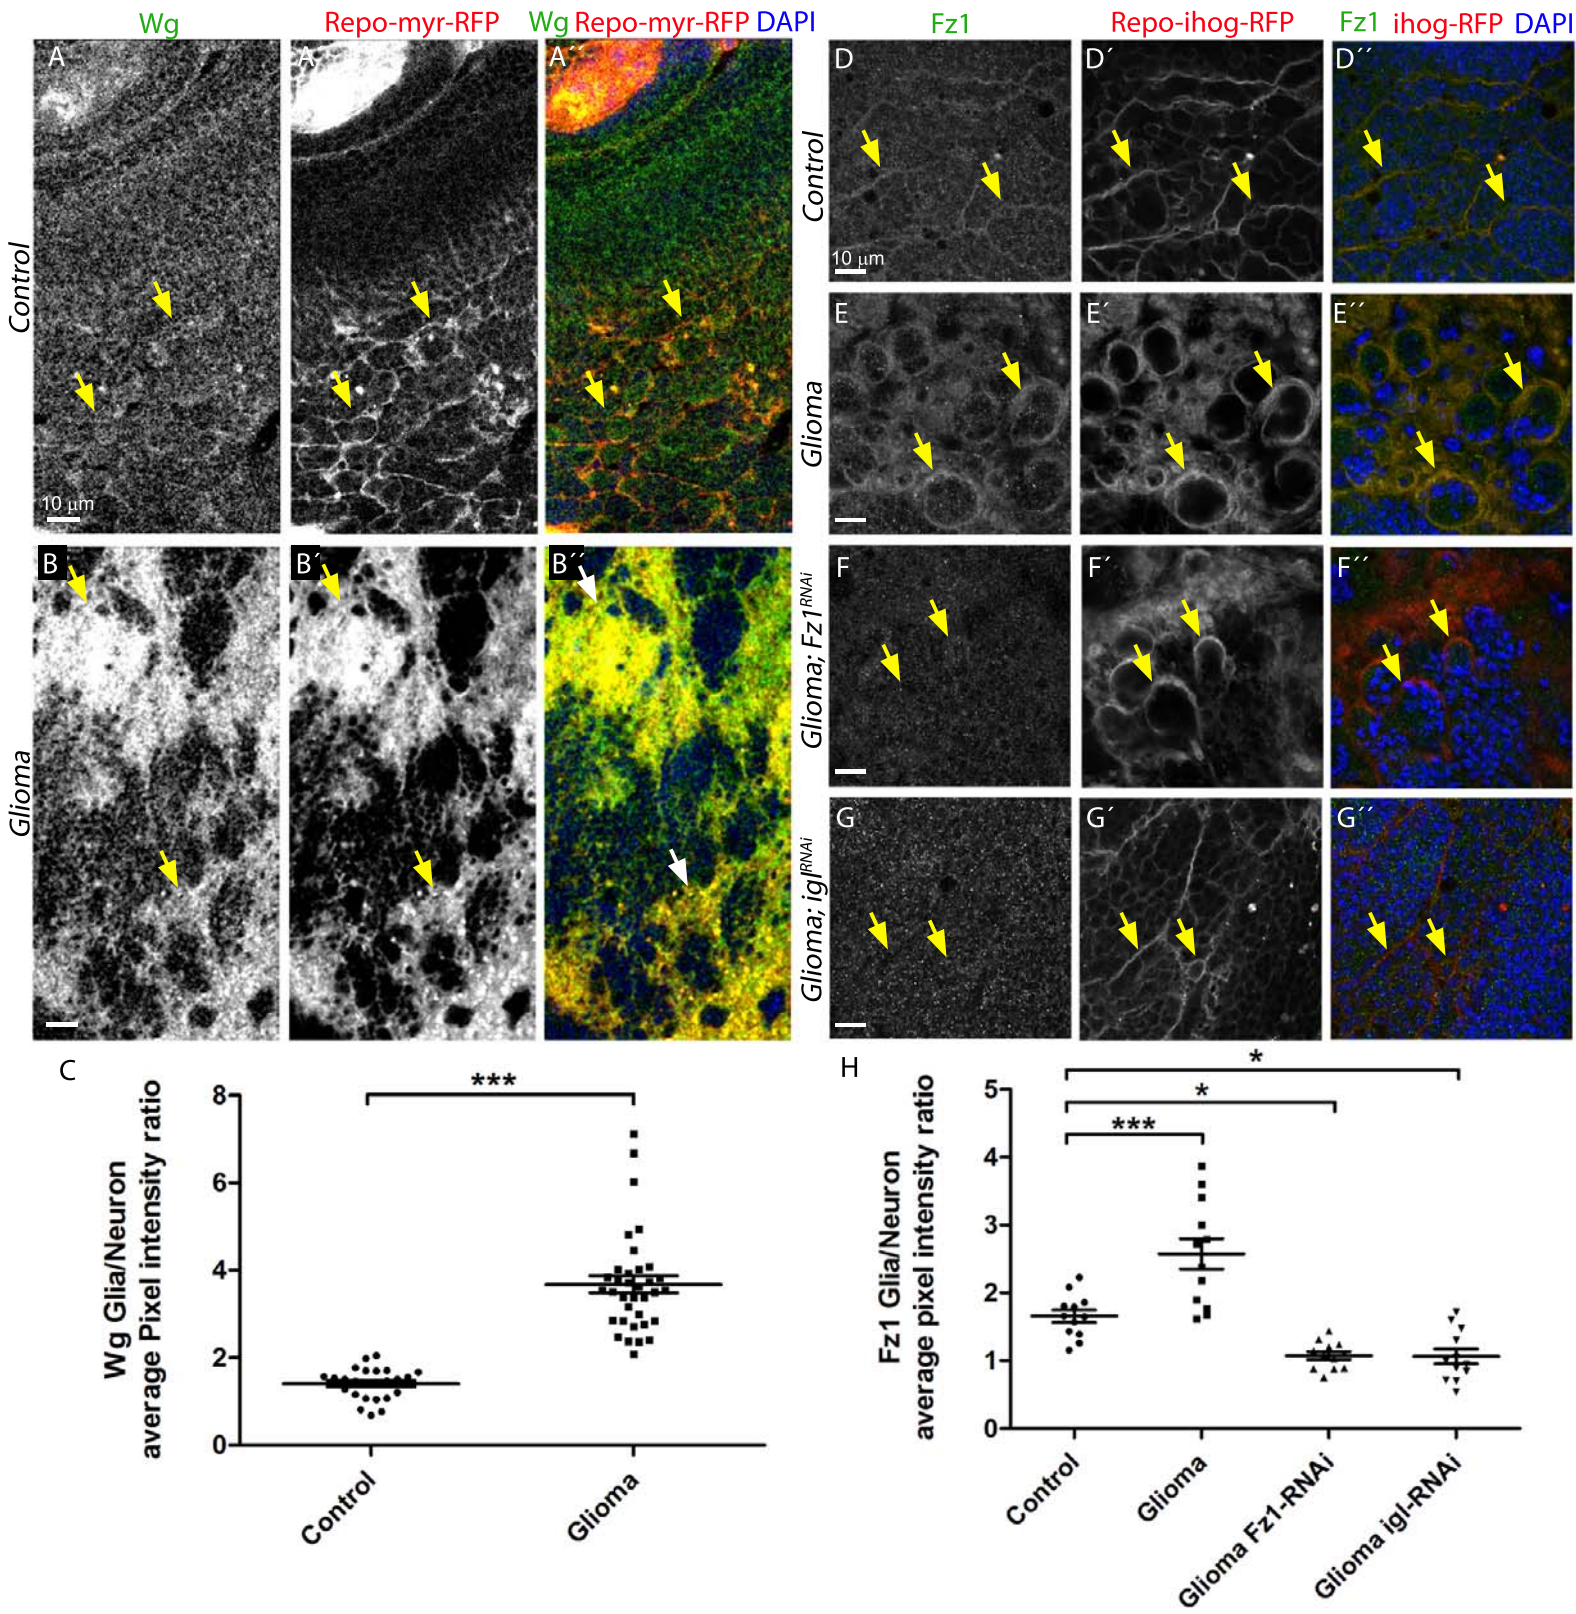



## Portela\_Fig3

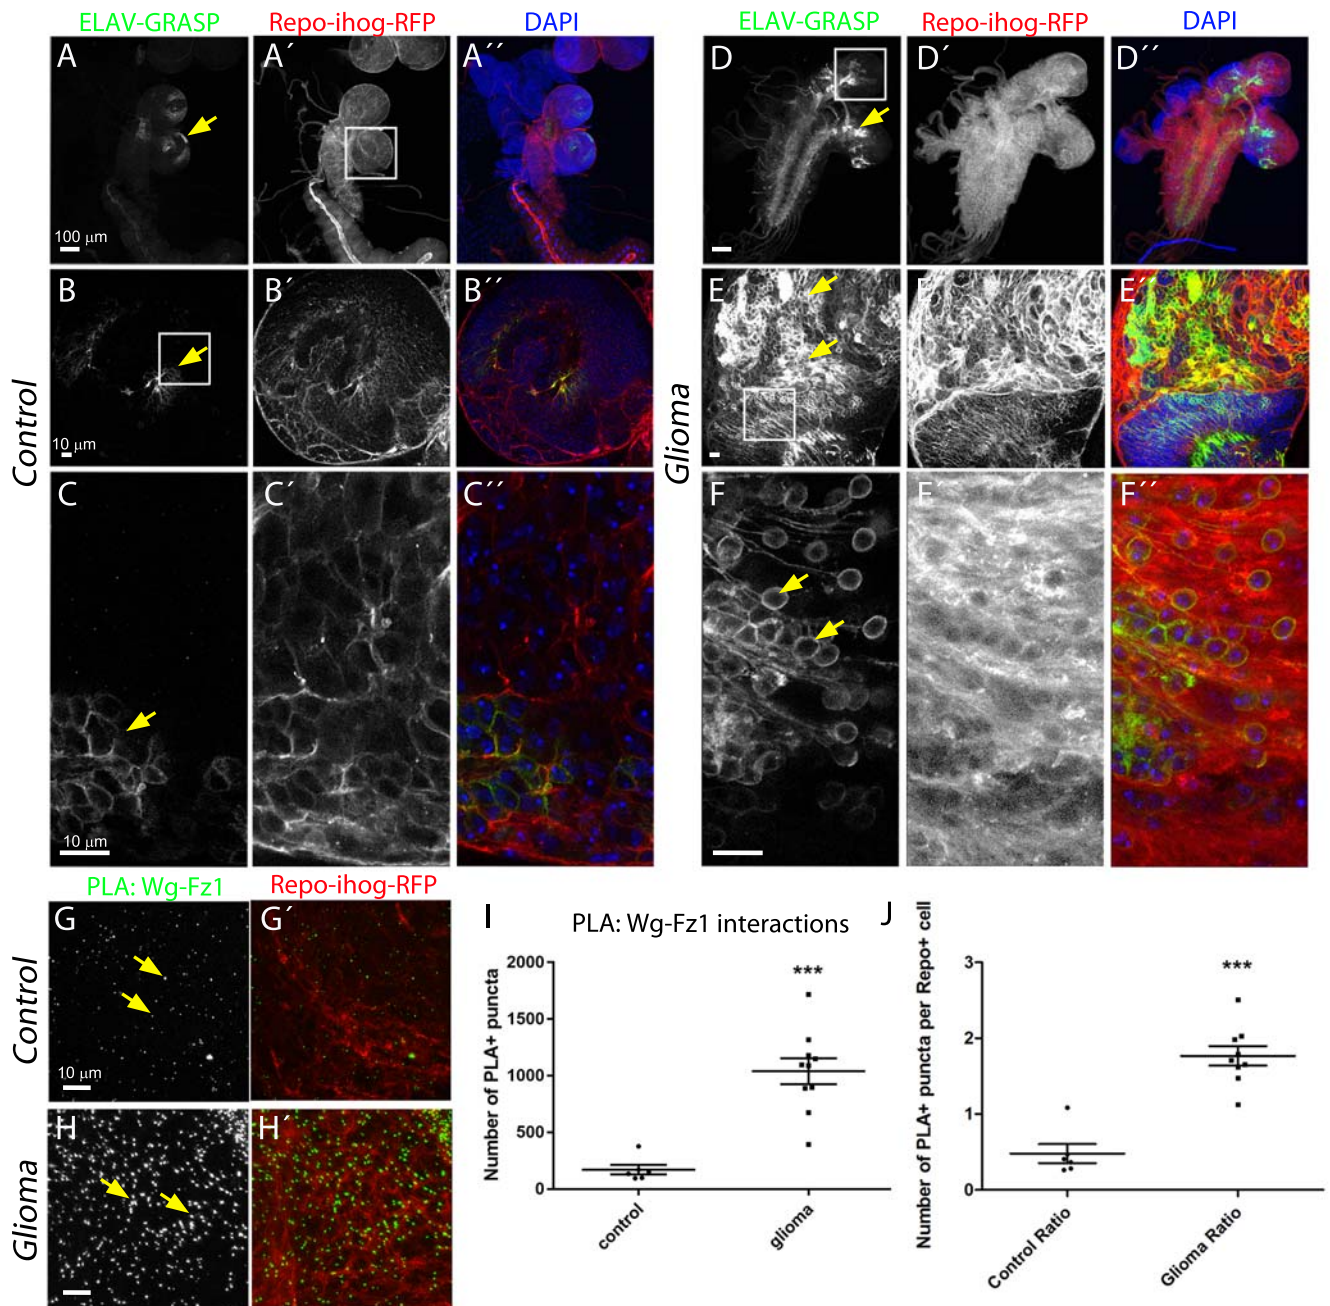

## Portela\_Fig4

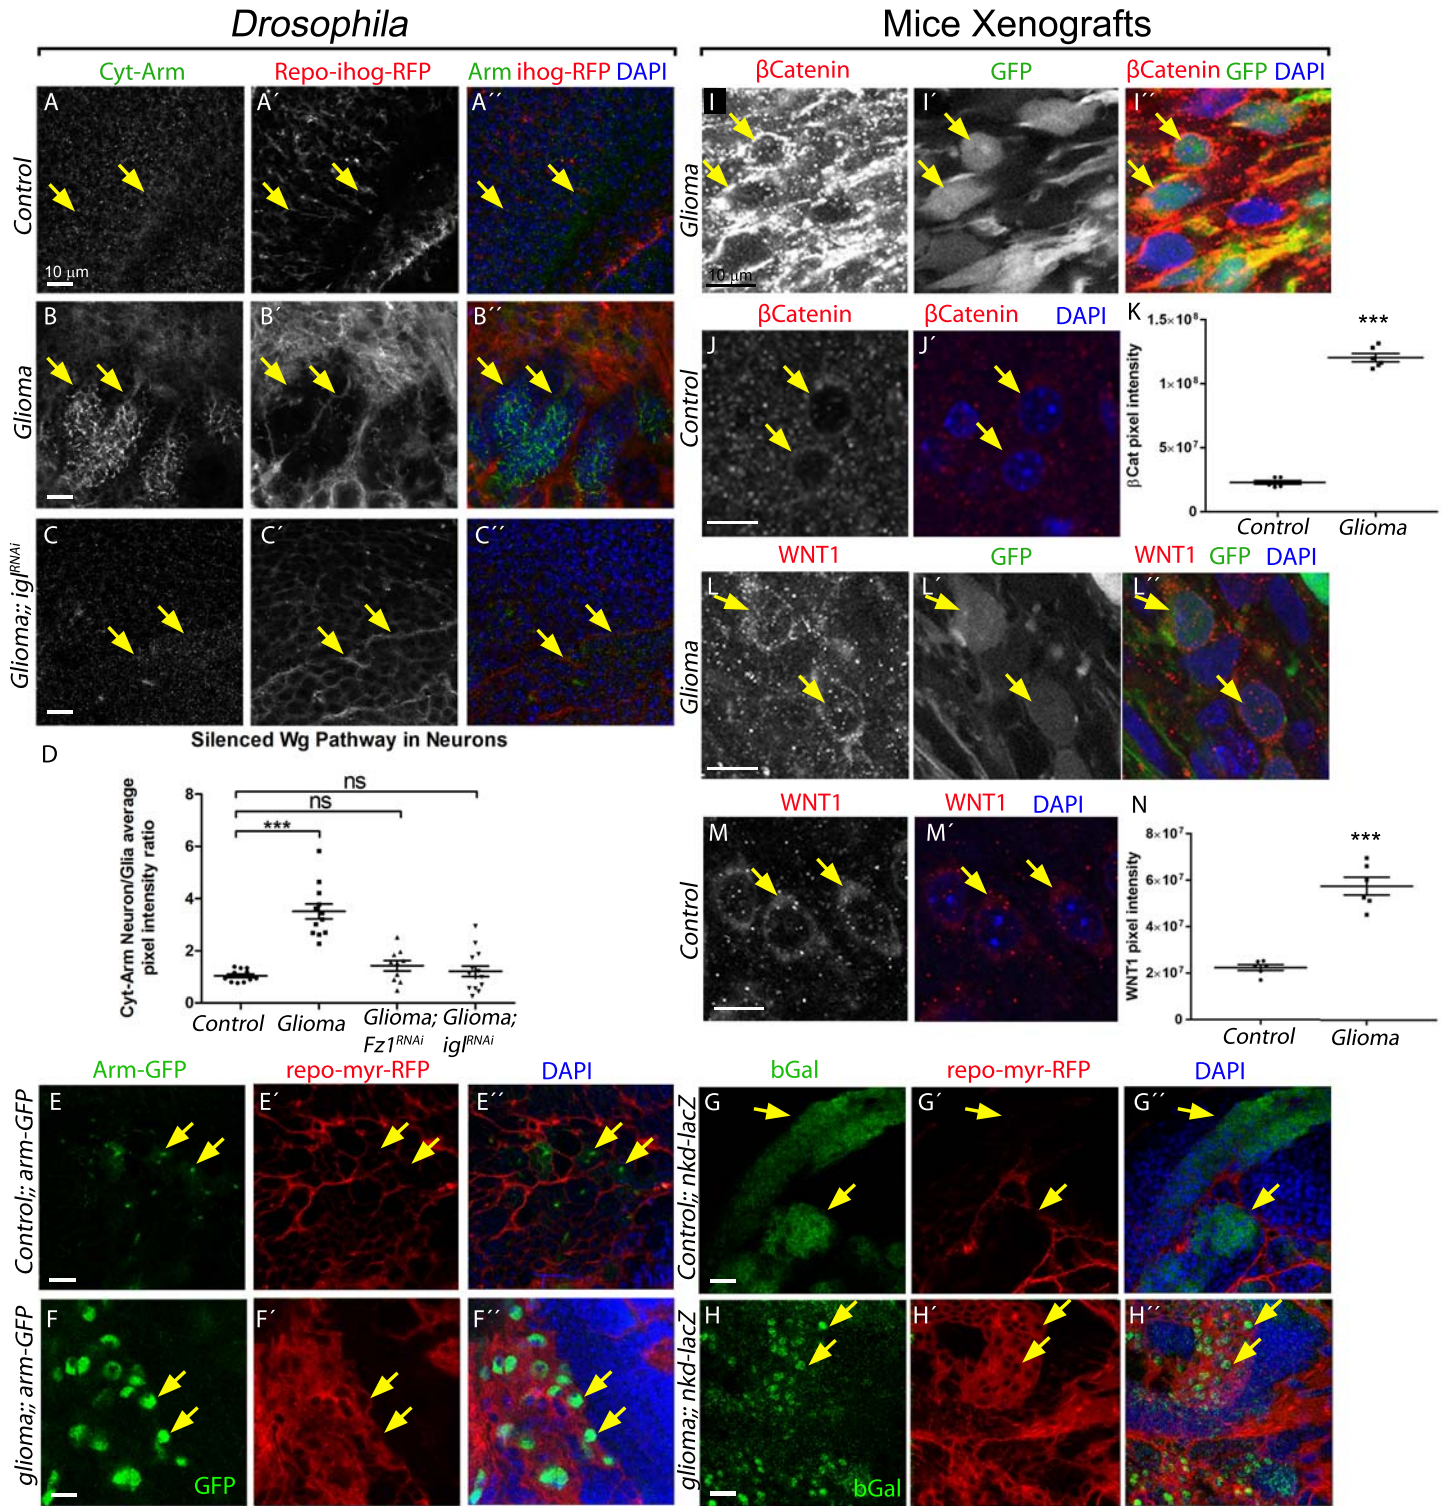

## Portela\_Fig5

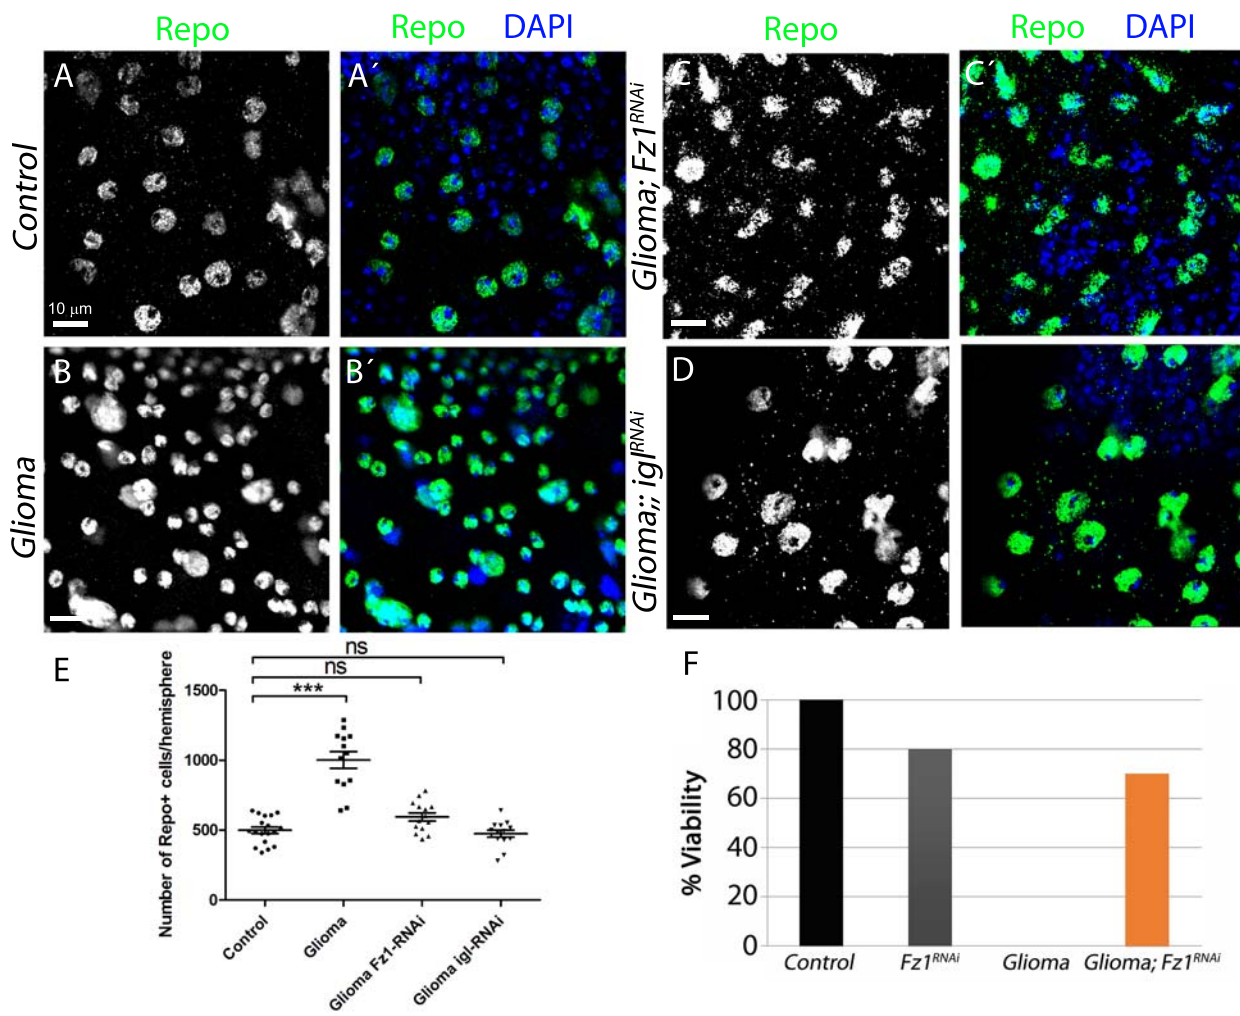

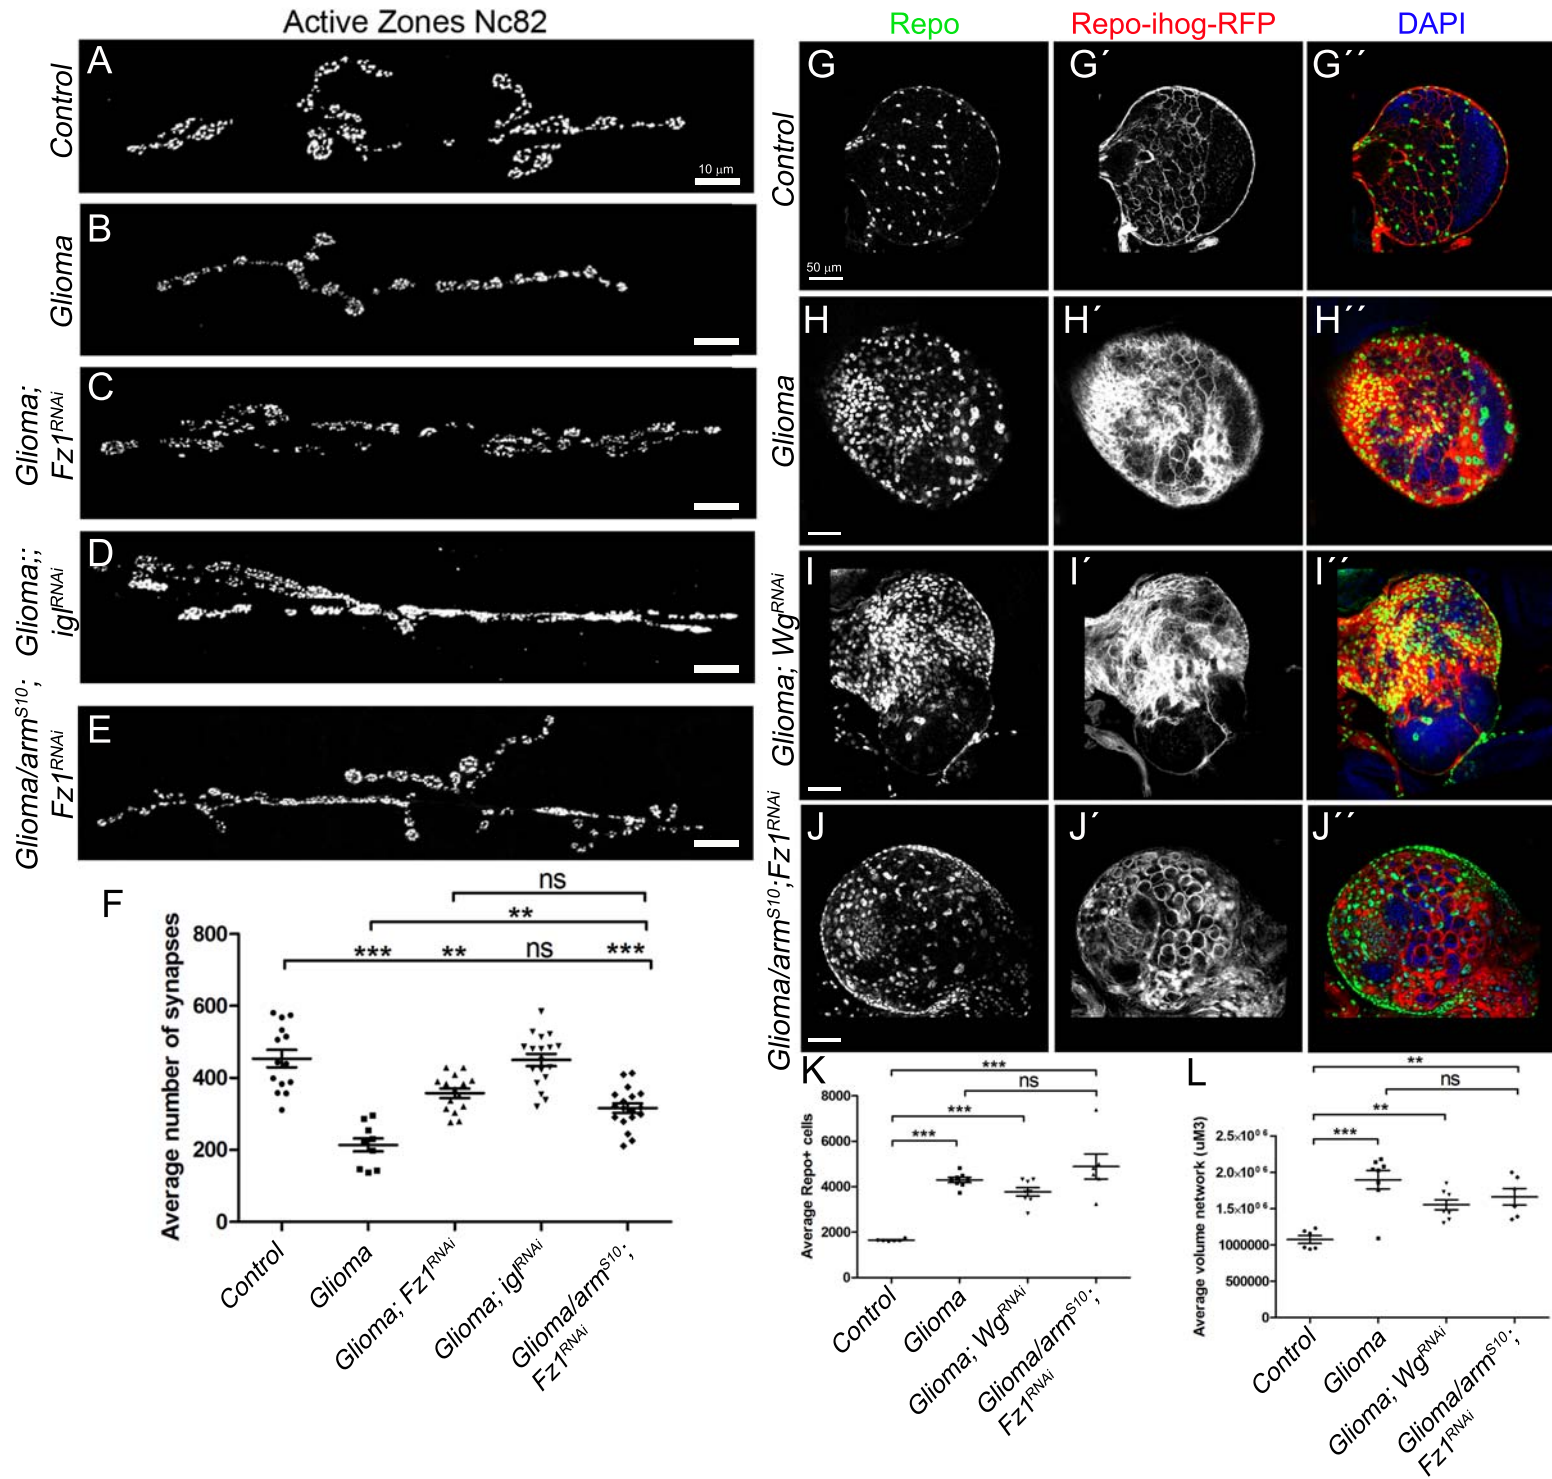

## Portela\_Fig7

### Active Zones Nc82

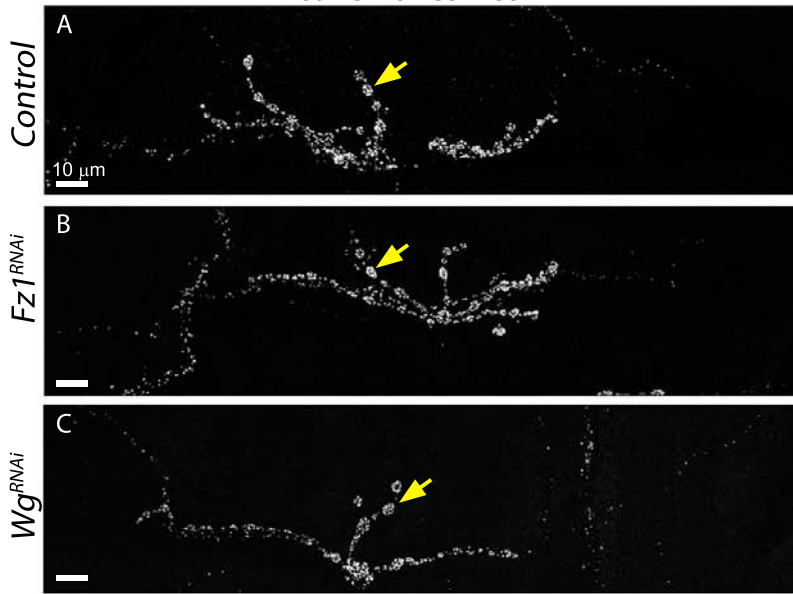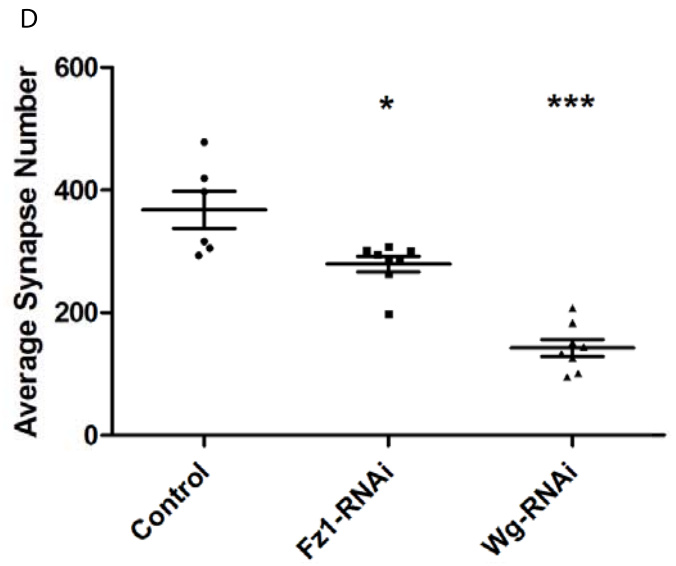

### Fz1 Repo-ihog-RFP Fz1 ihog-RFP DAPI

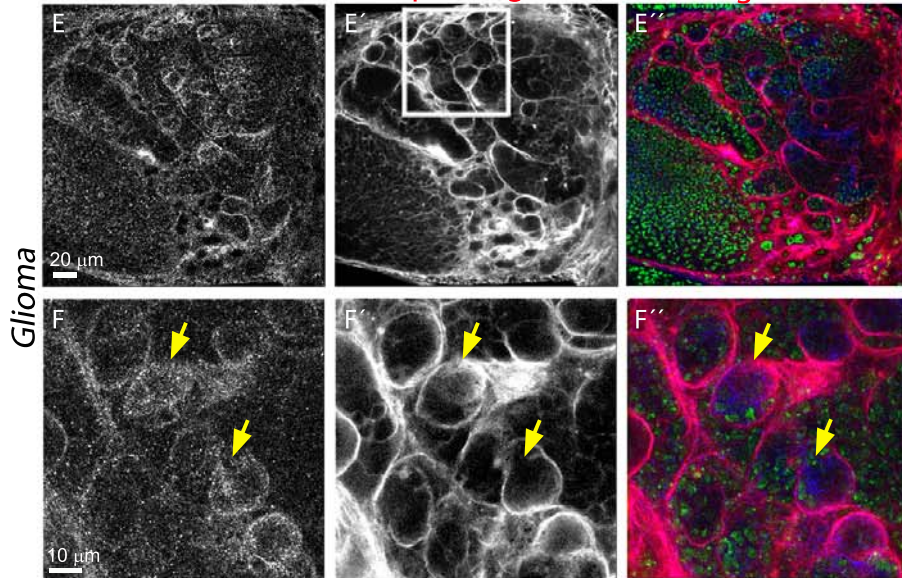

### Fz1 Repo-ihog-RFP Fz1 ihog-RFP ELAV-GFP

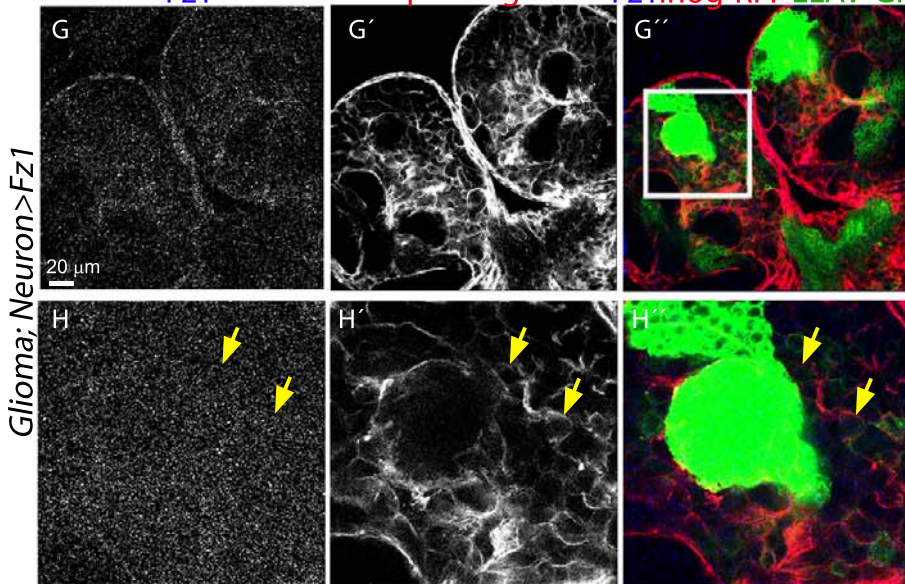

### Active Zones Nc82

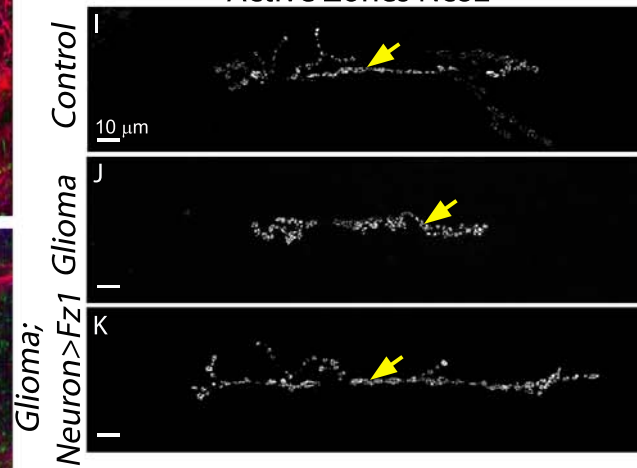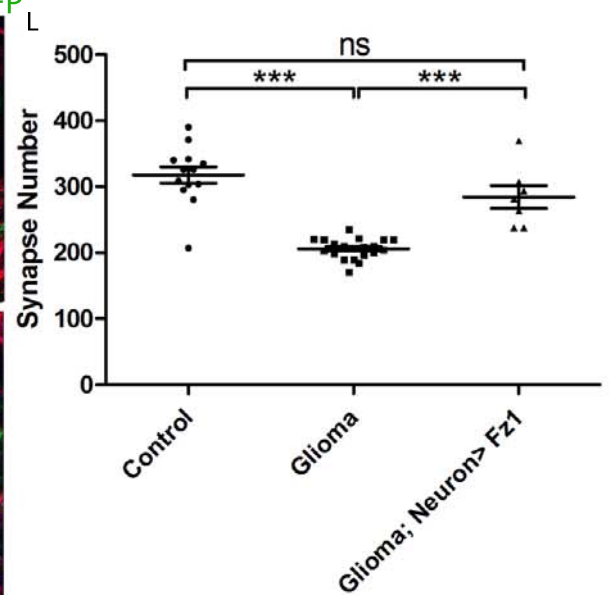

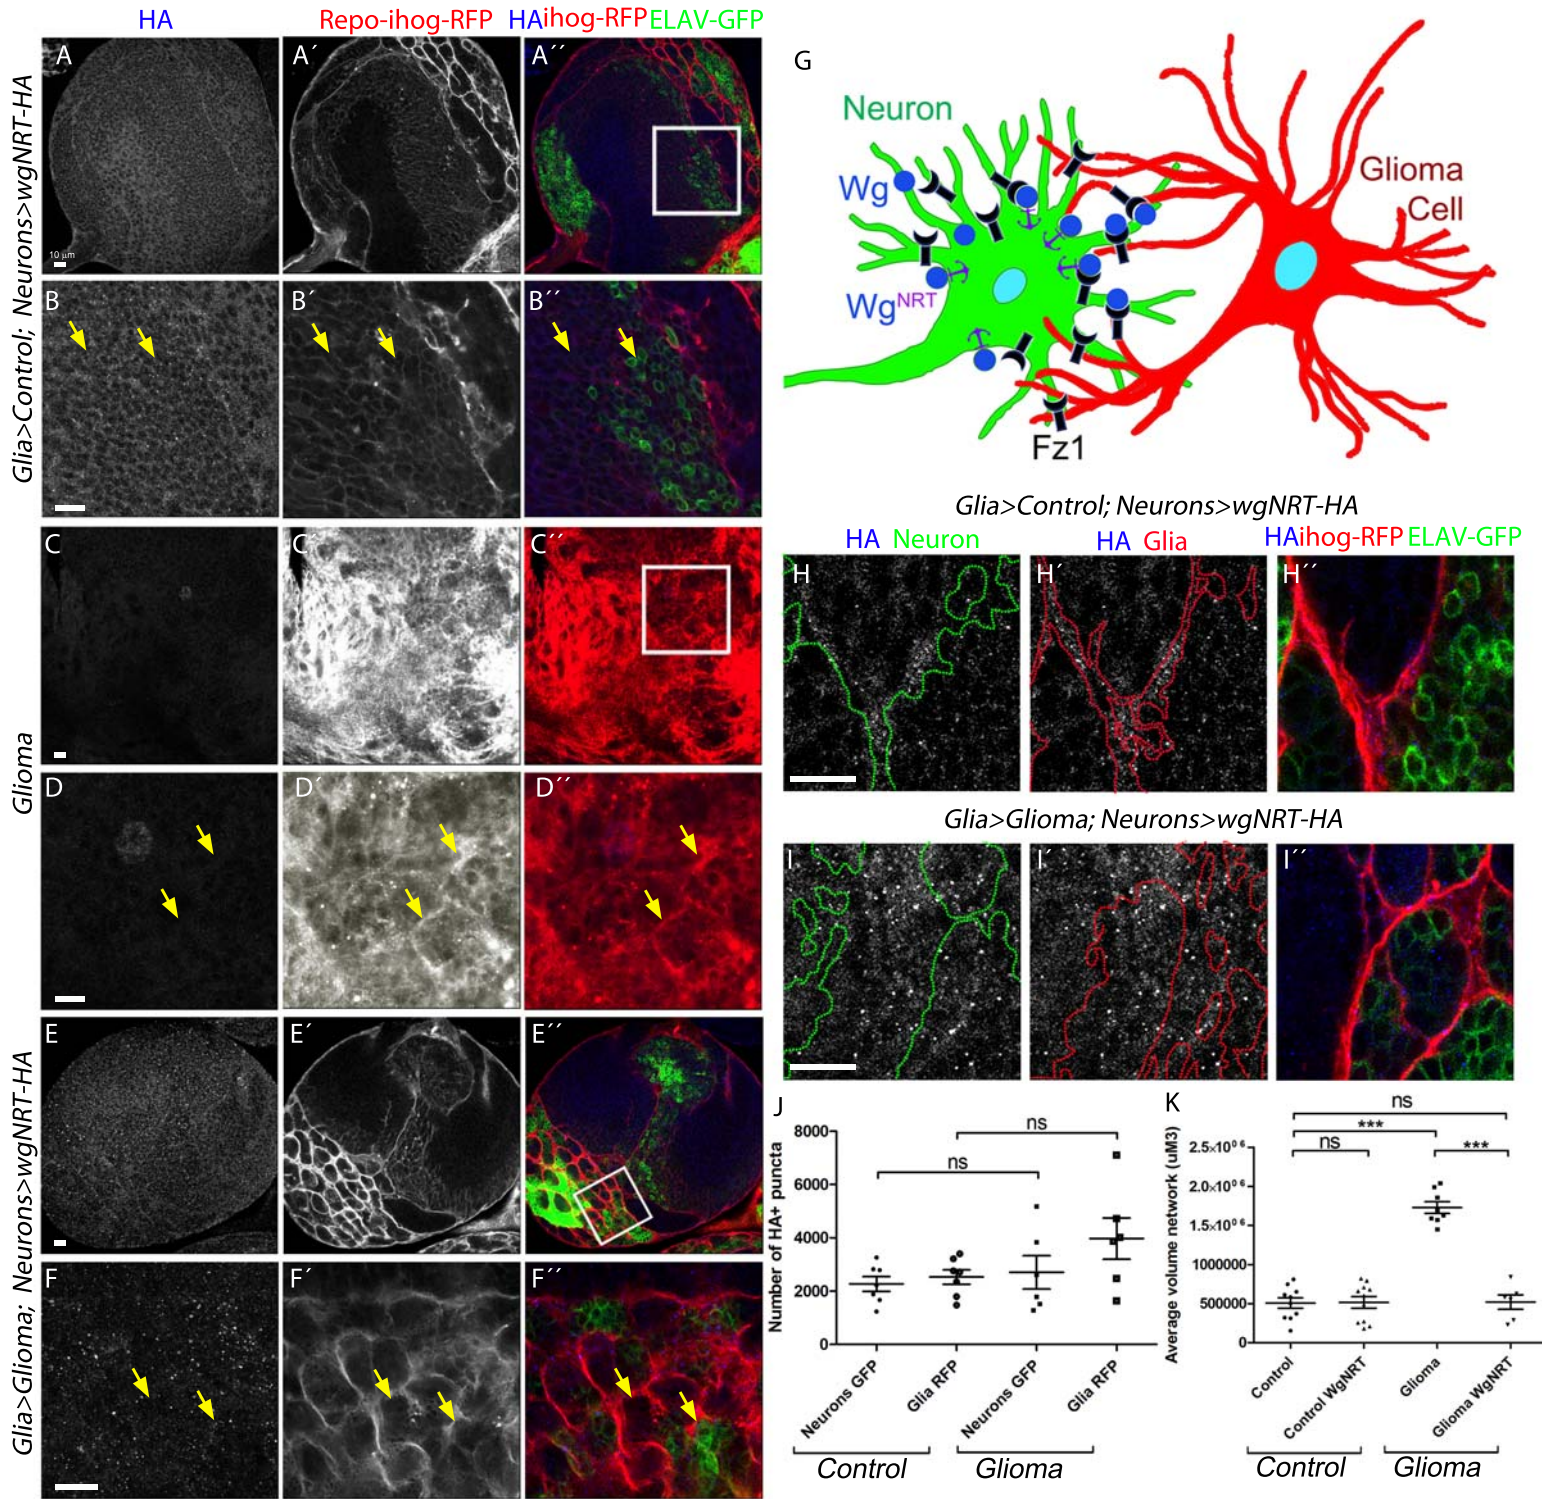

Source: https://www.biorxiv.org/content/10.1101/428953v2.full.pdf
