# Supplementary material for: WNT vampirization by glioblastoma leads to tumor growth and neurodegeneration
Source: bioRxiv or medRxiv preprint supplement (doi:10.1101/428953), 2018-12-14
Supplement: Supplementary file [file media-9.pdf]

**A** COSMIC Database

| Gene                                   | Cases with mutations | Number of analyzed GBMs | % of mutations     |
|----------------------------------------|----------------------|-------------------------|--------------------|
| WNT2                                   | 6                    | 922                     | 0,650759219        |
| WNT2B                                  | 2                    | 922                     | 0,21691974         |
| WNT2B_ENST00000369686                  | 1                    | 902                     | 0,110864745        |
| WNT3                                   | 1                    | 922                     | 0,10845987         |
| WNT5B_ENST00000397196                  | 1                    | 902                     | 0,110864745        |
| WNT8A                                  | 1                    | 922                     | 0,10845987         |
| WNT8B_ENST00000343737                  | 1                    | 902                     | 0,110864745        |
| WNT9A                                  | 3                    | 922                     | 0,32537961         |
| WNT9B                                  | 2                    | 922                     | 0,21691974         |
| WNT9B_ENST00000575372                  | 2                    | 902                     | 0,22172949         |
| WNT10A                                 | 2                    | 922                     | 0,21691974         |
| WNT10B                                 | 1                    | 922                     | 0,10845987         |
| WNT11                                  | 1                    | 922                     | 0,10845987         |
| <b>SUM WNT</b>                         |                      |                         | <b>2,615061252</b> |
| FZD1                                   | 3                    | 922                     | 0,32537961         |
| FZD3                                   | 3                    | 922                     | 0,32537961         |
| FZD5                                   | 1                    | 922                     | 0,10845987         |
| FZD6                                   | 3                    | 923                     | 0,325027086        |
| FZD7                                   | 1                    | 922                     | 0,10845987         |
| FZD8                                   | 3                    | 902                     | 0,332594235        |
| FZD9                                   | 4                    | 922                     | 0,433839479        |
| FZD10                                  | 5                    | 922                     | 0,542299349        |
| <b>SUM FZD</b>                         |                      |                         | <b>2,501439108</b> |
| ASCL1                                  | 1                    | 922                     | 0,10845987         |
| DVL2                                   | 2                    | 922                     | 0,21691974         |
| FOXM1                                  | 5                    | 922                     | 0,542299349        |
| <b>Genes without mutations in GBMs</b> |                      |                         |                    |
| WNT1                                   | 0                    | 922                     |                    |
| WNT3A                                  | 0                    | 922                     |                    |
| WNT3A_ENST00000366753                  | 0                    | 902                     |                    |
| WNT4                                   | 0                    | 922                     |                    |
| WNT4_ENST00000374655                   | 0                    | 902                     |                    |
| WNT5A                                  | 0                    | 922                     |                    |
| WNT5B                                  | 0                    | 922                     |                    |
| WNT6                                   | 0                    | 922                     |                    |
| WNT6_ENST00000233948                   | 0                    | 902                     |                    |
| WNT7A                                  | 0                    | 922                     |                    |
| WNT7B                                  | 0                    | 922                     |                    |
| WNT8B                                  | 0                    | 922                     |                    |
| WNT16                                  | 0                    | 922                     |                    |
| WNT16_ENST00000361301                  | 0                    | 902                     |                    |
| FZD2                                   | 0                    | 922                     |                    |
| FZD4                                   | 0                    | 922                     |                    |

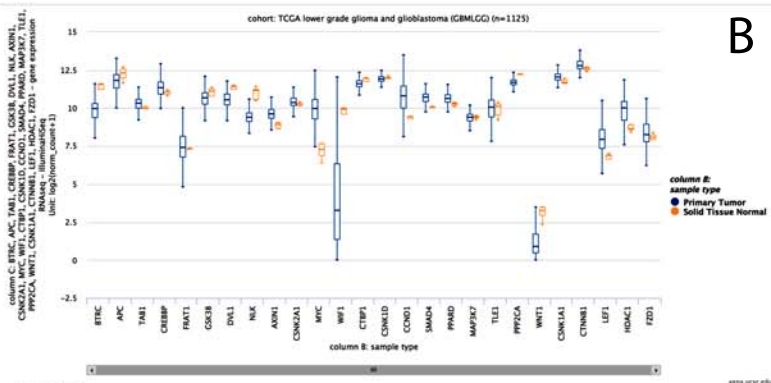

Welch's t-test

|                                    |                                      |                                     |                                     |                                    |                                      |                                     |
|------------------------------------|--------------------------------------|-------------------------------------|-------------------------------------|------------------------------------|--------------------------------------|-------------------------------------|
| BTRC<br>t = -4.799<br>p = 0.008313 | APC<br>t = -2.037<br>p = 0.04003     | TAB1<br>t = 0.8518<br>p = 0.4414    | CREBBP<br>t = 4.042<br>p = 0.009591 | FRAT1<br>t = 1.549<br>p = 0.1892   | GSK3B<br>t = -1.270<br>p = 0.2716    | DVL1<br>t = 15.32<br>p = 0.00001040 |
| NLK<br>t = -8.926<br>p = 0.0007450 | AXIN1<br>t = 2.989<br>p = 0.03962    | CSNK2A1<br>t = 2.677<br>p = 0.04488 | MYC<br>t = 6.296<br>p = 0.003012    | WIF1<br>t = -5.076<br>p = 0.006803 | CTBP1<br>t = -5.677<br>p = 0.003085  | CSNK1D<br>t = -0.7610<br>p = 0.4874 |
| CCND1<br>t = 4.926<br>p = 0.006881 | SMAD4<br>t = 8.597<br>p = 0.0005964  | PPAR4<br>t = 7.193<br>p = 0.0009659 | MAP3K7<br>t = -0.6991<br>p = 0.5226 | TLE1<br>t = 0.3668<br>p = 0.7315   | PPP2CA<br>t = -6.207<br>p = 0.003009 |                                     |
| WNT1<br>t = -4.209<br>p = 0.01336  | CSNK1A1<br>t = 5.543<br>p = 0.004005 | CTNNB1<br>t = 4.675<br>p = 0.006656 | LEF1<br>t = 7.816<br>p = 0.001002   | HDAC1<br>t = 4.405<br>p = 0.01068  | FZD1<br>t = 2.547<br>p = 0.05957     |                                     |

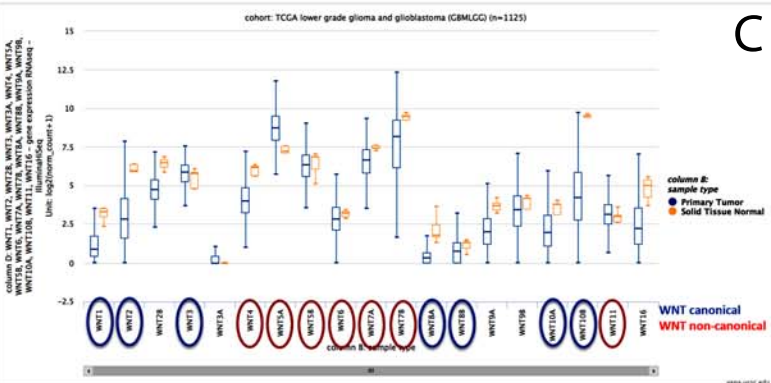

Welch's t-test

|                                     |                                     |                                      |                                   |                                      |                                      |                                     |                                        |                                   |
|-------------------------------------|-------------------------------------|--------------------------------------|-----------------------------------|--------------------------------------|--------------------------------------|-------------------------------------|----------------------------------------|-----------------------------------|
| WNT1<br>t = -4.209<br>p = 0.01336   | WNT2<br>t = -8.086<br>p = 0.0009206 | WNT2B<br>t = -10.12<br>p = 0.0002710 | WNT3<br>t = 1.105<br>p = 0.3291   | WNT3A<br>t = 13.50<br>p = 0.000      | WNT4<br>t = -11.94<br>p = 0.00006337 | WNT5A<br>t = 6.866<br>p = 0.001762  | WNT5B<br>t = -0.3102<br>p = 0.7715     | WNT6<br>t = -2.360<br>p = 0.05761 |
| WNT7A<br>t = -4.725<br>p = 0.007457 | WNT7B<br>t = -3.700<br>p = 0.01734  | WNT8A<br>t = -4.806<br>p = 0.008486  | WNT8B<br>t = -1.705<br>p = 0.1587 | WNT9A<br>t = -9.615<br>p = 0.0002432 | WNT9B<br>t = -0.1077<br>p = 0.9193   | WNT10A<br>t = -2.320<br>p = 0.07898 | WNT10B<br>t = -13.69<br>p = 0.00008213 | WNT11<br>t = 1.062<br>p = 0.3412  |
|                                     |                                     |                                      |                                   |                                      |                                      |                                     | WNT16<br>t = -6.564<br>p = 0.001849    |                                   |

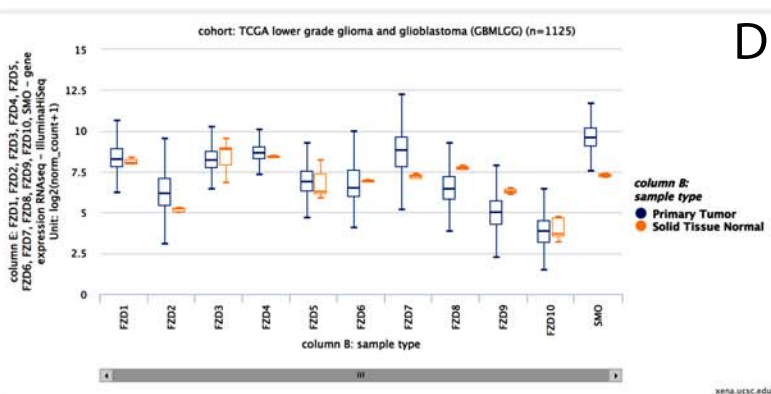

Welch's t-test

|                                  |                                     |                                      |                                    |                                     |
|----------------------------------|-------------------------------------|--------------------------------------|------------------------------------|-------------------------------------|
| FZD1<br>t = 2.547<br>p = 0.05957 | FZD2<br>t = 7.873<br>p = 0.0003746  | FZD3<br>t = -0.4067<br>p = 0.7048    | FZD4<br>t = 1.944<br>p = 0.1212    | FZD5<br>t = 0.5511<br>p = 0.6105    |
| FZD6<br>t = 0.2234<br>p = 0.8329 | FZD7<br>t = 11.55<br>p = 0.00001613 | FZD8<br>t = -11.42<br>p = 0.00001797 | FZD9<br>t = -16.90<br>p = 2.315e-7 | FZD10<br>t = -0.3254<br>p = 0.7606  |
|                                  |                                     |                                      |                                    | SMO<br>t = 19.65<br>p = 0.000007692 |

**B**

**C**

**D**
