# Supplementary material for: WNT vampirization by glioblastoma leads to tumor growth and neurodegeneration
Source: bioRxiv or medRxiv preprint supplement (doi:10.1101/428953), 2018-12-14

# Portela\_FigS7

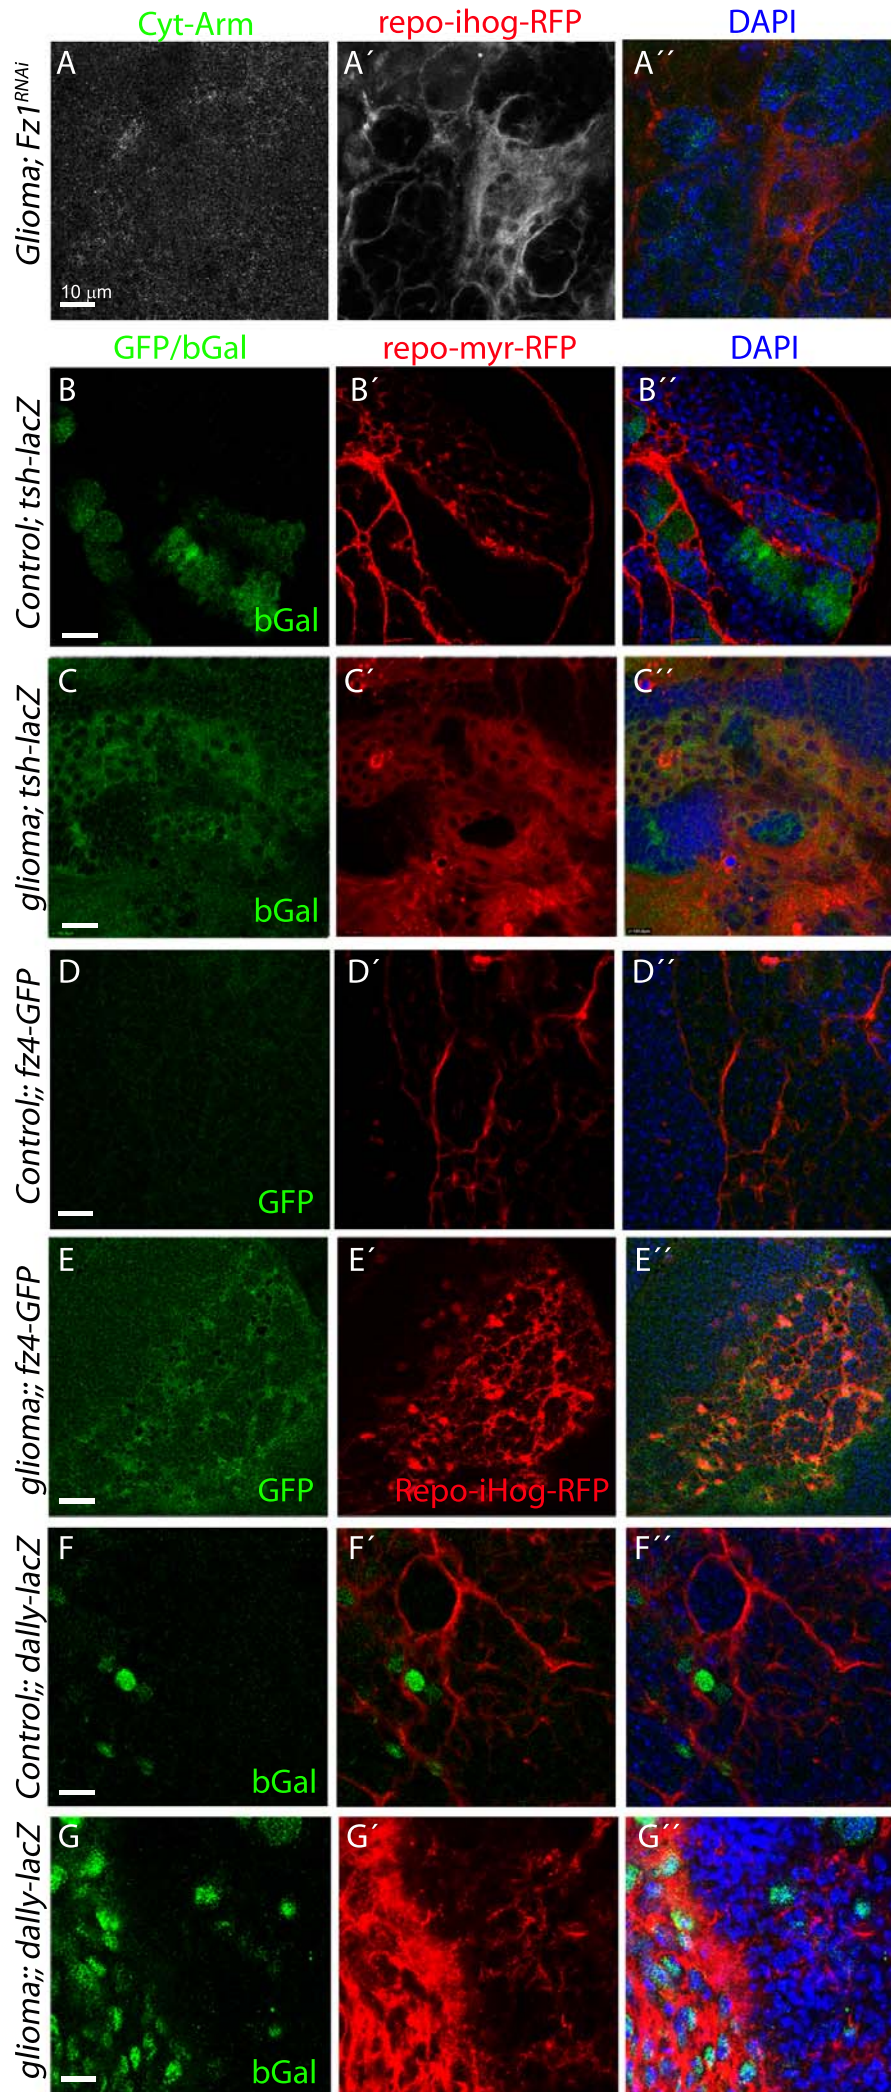

Supplement: Supplementary file [file media-13.pdf]
